# Supplementary material for: Emergence and Modular Evolution of a Novel Motility Machinery in Bacteria
Source: PubMed Central journal article supplement (PMC3169522; doi:10.1371/journal.pgen.1002268), 2011-09-08

*Myxococcus xanthus* DK\_1622 (Taxid: 246197/Deltaproteobacteria)

Cluster G1

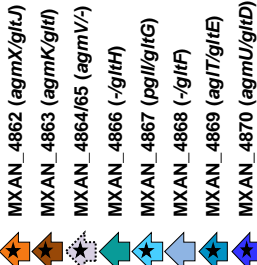

Cluster G2

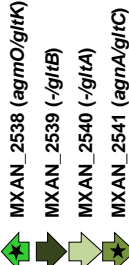

Cluster M1

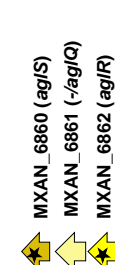

Cluster G3

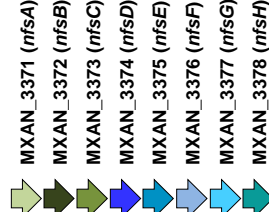

Cluster G4

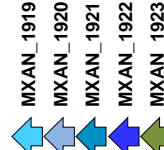

Cluster G5

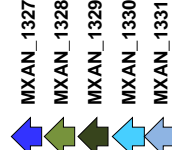

Cluster M2

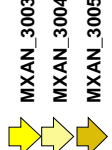

*Stigmatella aurantiaca* DW4/3-1 (Taxid: 378806/Deltaproteobacteria)

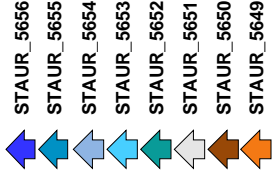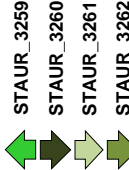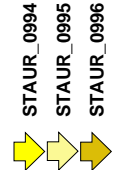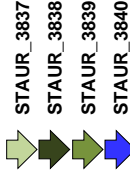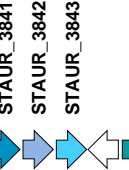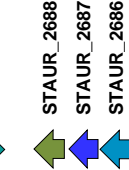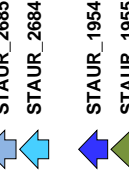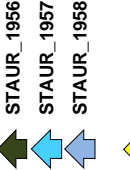

*Bdellovibrio bacteriovorus* HD100 (Taxid: 264462/Deltaproteobacteria)

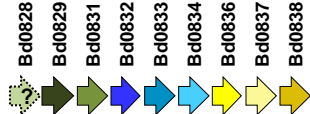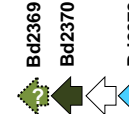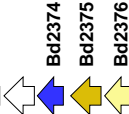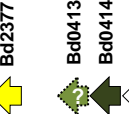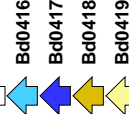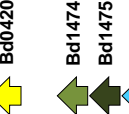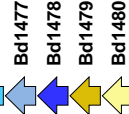

*Anaeromyxobacter dehalogenans* 2CP-C (Taxid: 290397/Deltaproteobacteria)

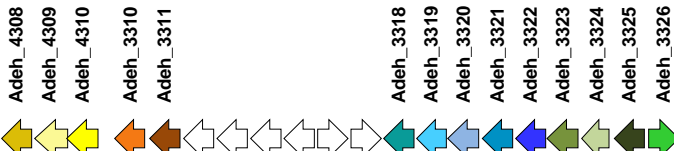

*Anaeromyxobacter dehalogenans* 2CP-1 (Taxid: 455488/Deltaproteobacteria)

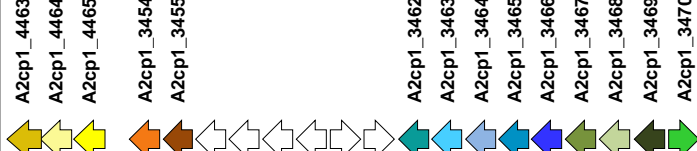

*Anaeromyxobacter* sp. Fw 109-5 (Taxid: 404589 /Deltaproteobacteria)

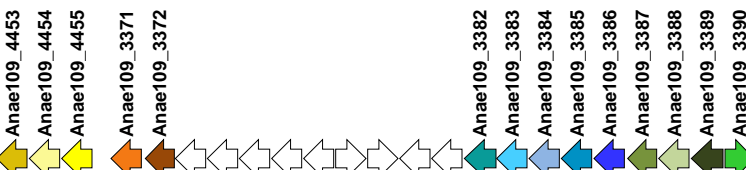

*Anaeromyxobacter* sp. K (Taxid: 447217/Deltaproteobacteria)

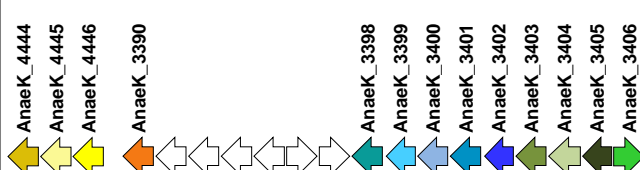

***Geobacter uraniireducens* Rf4**  
(Taxid: 351605/Deltaproteobacteria)

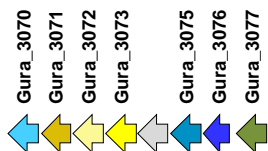

***Geobacter* sp. M21**  
(Taxid: 443144/Deltaproteobacteria)

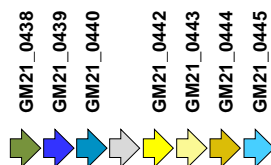

***Fibrobacter succinogenes* S85**  
(Taxid:59374/Fibrobacteres)

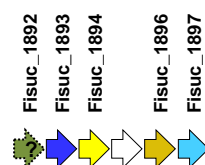

***Haliangium ochraceum* DSM 14365** (Taxid: 502025/Gammaproteobacteria)

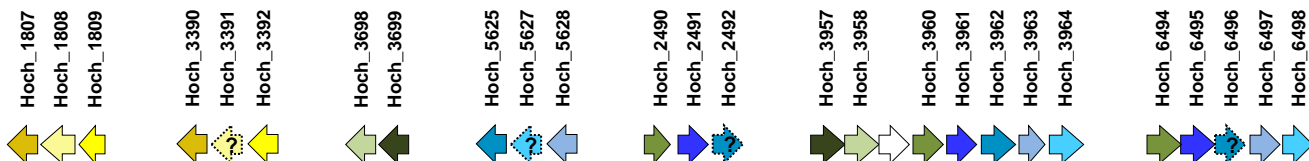

***Sorangium cellulosum* Soce56** (Taxid: 448385/Deltaproteobacteria)

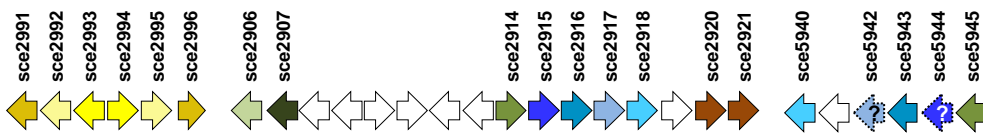

***Thioalkalivibrio* sp. HL-EbGR7**  
(Taxid: 396588/Gammaproteobacteria)

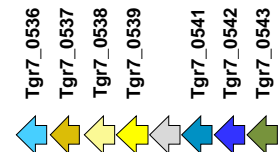

***Teredinibacter turnerae* T7901** (Taxid: 377629/Gammaproteobacteria)

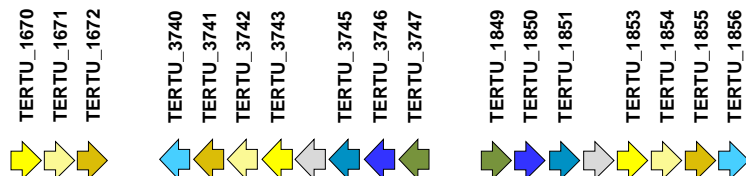

***Sccharophagus degradans* 2-40**  
(Taxid: 203122/Gammaproteobacteria)

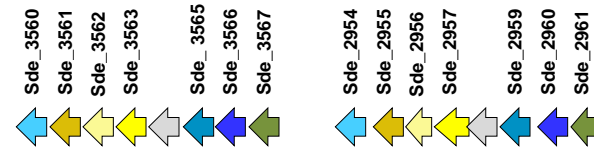

***Hahella chejuensis* KCTC 2396**  
(Taxid: 349521/Gammaproteobacteria)

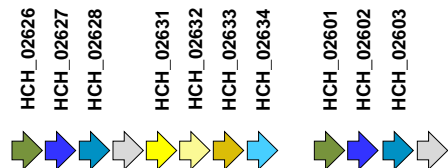

***Cellvibrio japonicus* Ueda107**  
(Taxid:498211/Gammaproteobacteria)

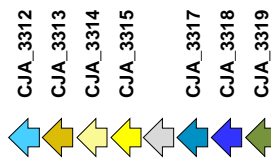

***Shewanella frigidimarina* NCIMB 400**  
(Taxid: 318167/Gammaproteobacteria)

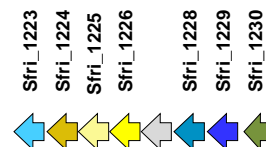

***Marinobacter aquaeolei* VT8** (Taxid: 351348/Gammaproteobacteria)

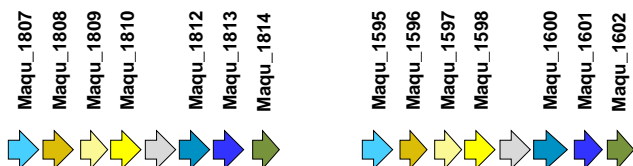

***Methylibium petroleiphilum* PM1**  
(Taxid: 420662/Betaproteobacteria)

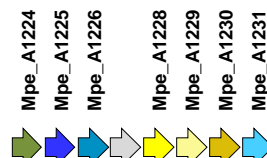

Supplement: pgen.1002268.s001.pdf [file pgen.1002268.s001.pdf]
