# Supplementary material for: Emergence and Modular Evolution of a Novel Motility Machinery in Bacteria
Source: PubMed Central journal article supplement (PMC3169522; doi:10.1371/journal.pgen.1002268), 2011-09-08

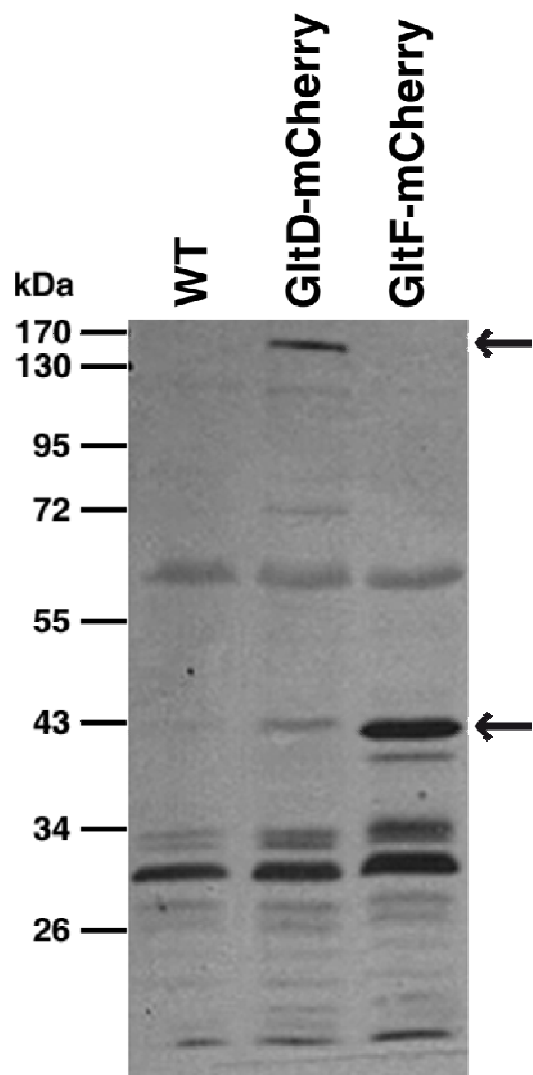

Supplement: pgen.1002268.s003.pdf [file pgen.1002268.s003.pdf]
