# Supplementary material for: Emergence and Modular Evolution of a Novel Motility Machinery in Bacteria
Source: PubMed Central journal article supplement (PMC3169522; doi:10.1371/journal.pgen.1002268), 2011-09-08

**A**

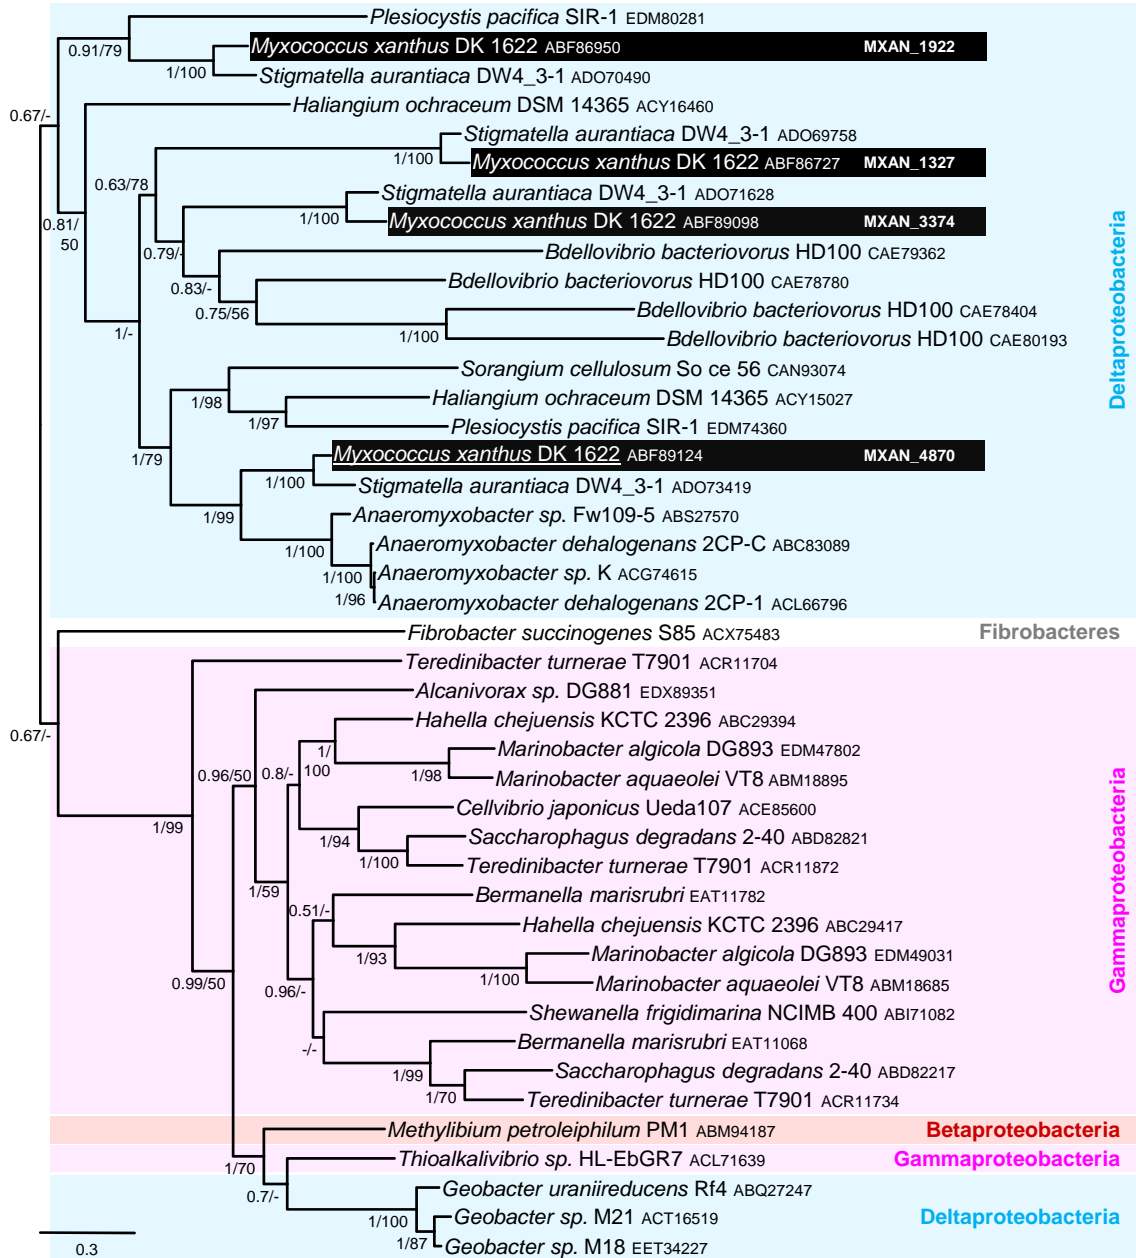

**B**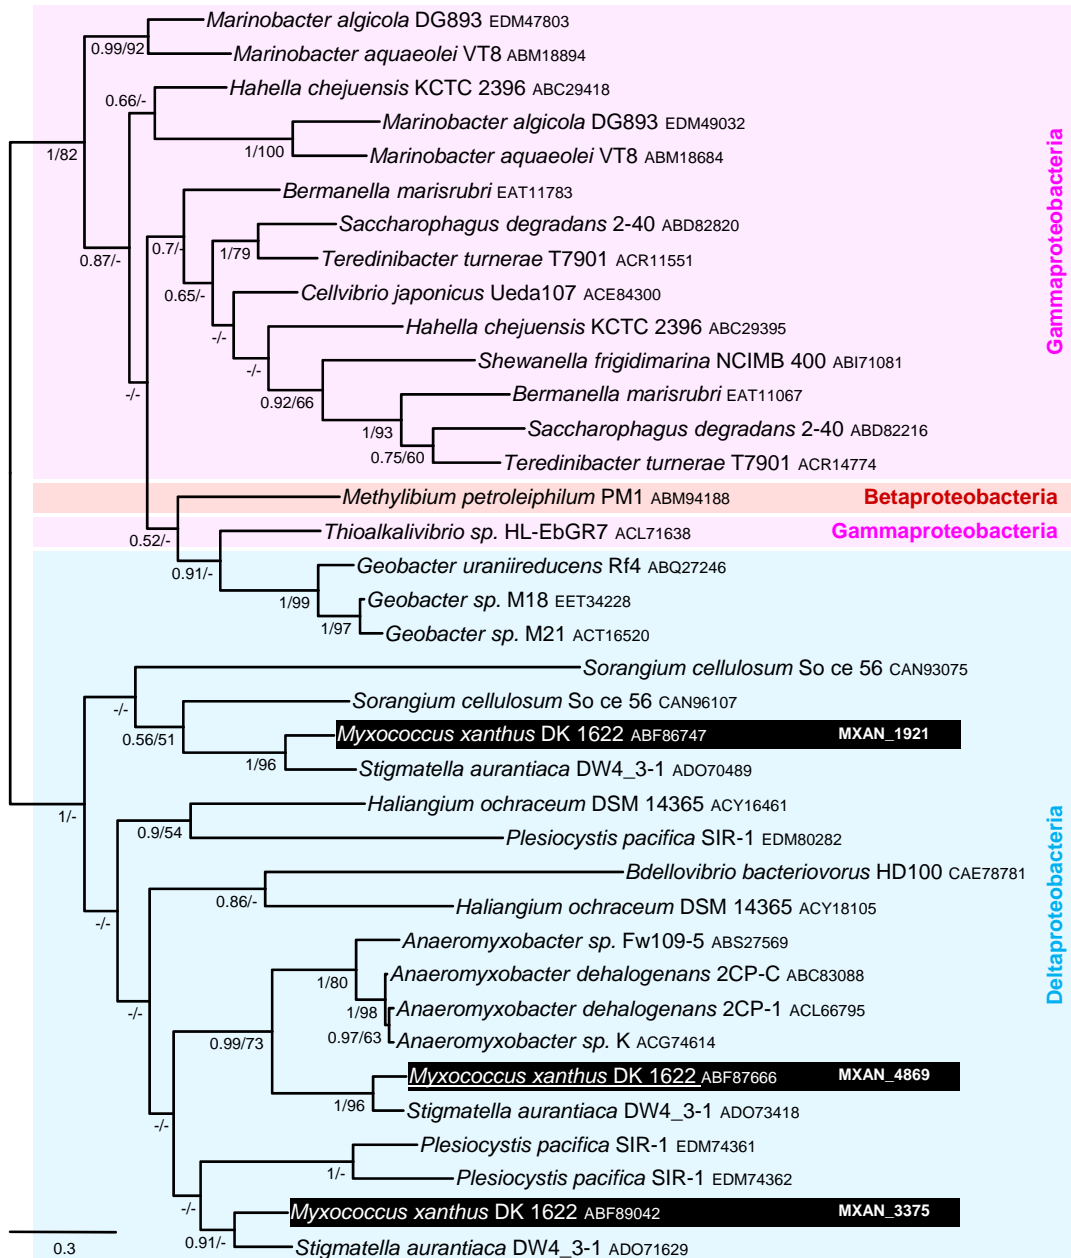

C

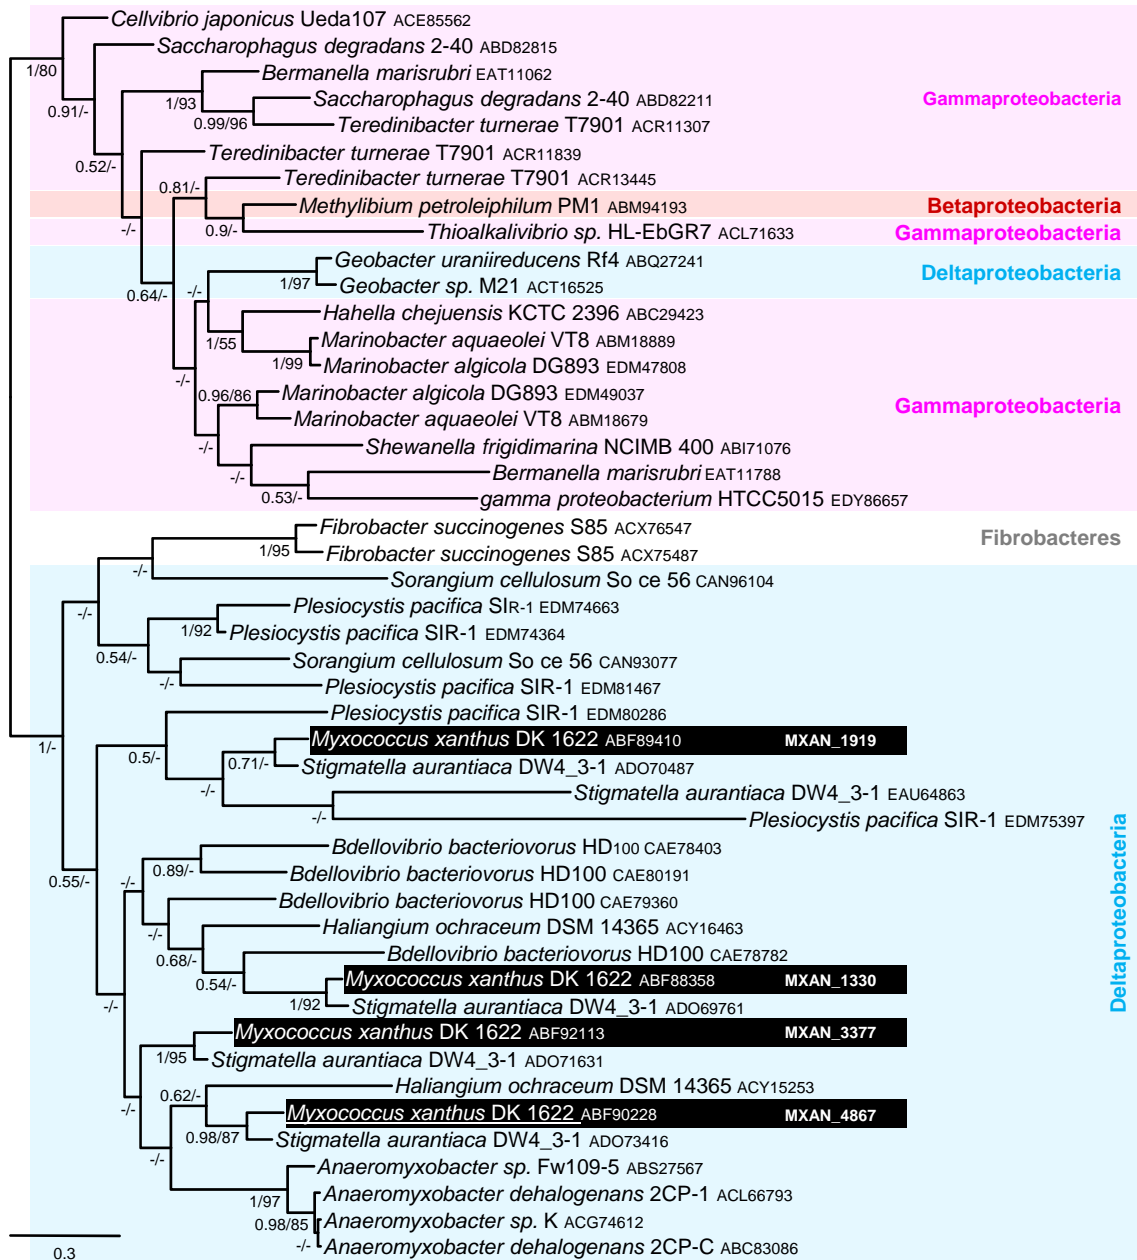

**D**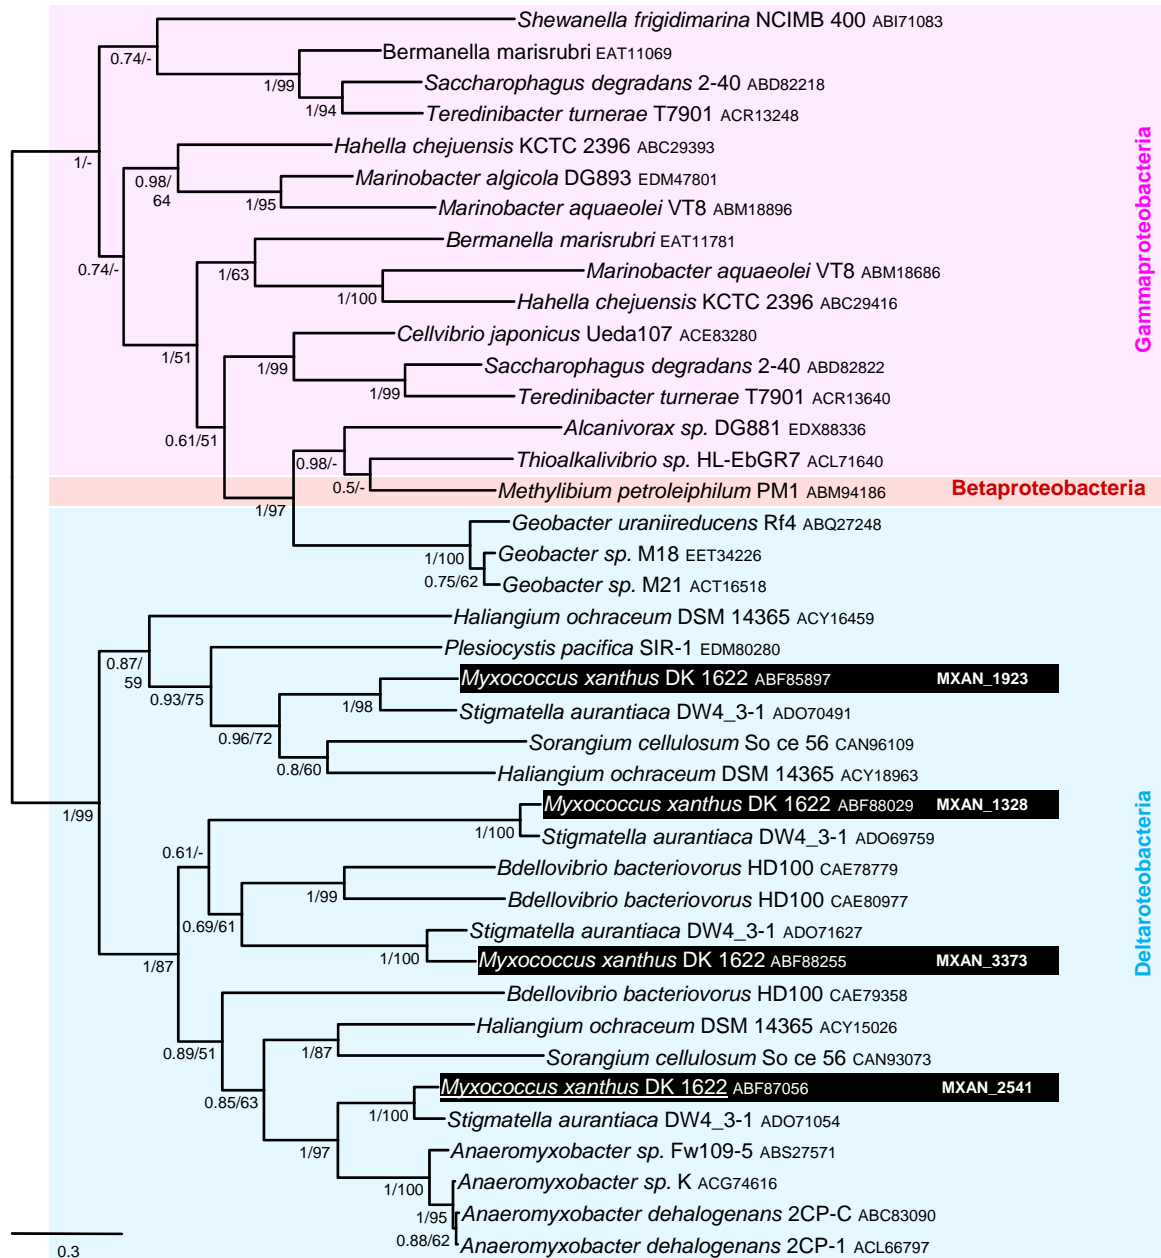

E

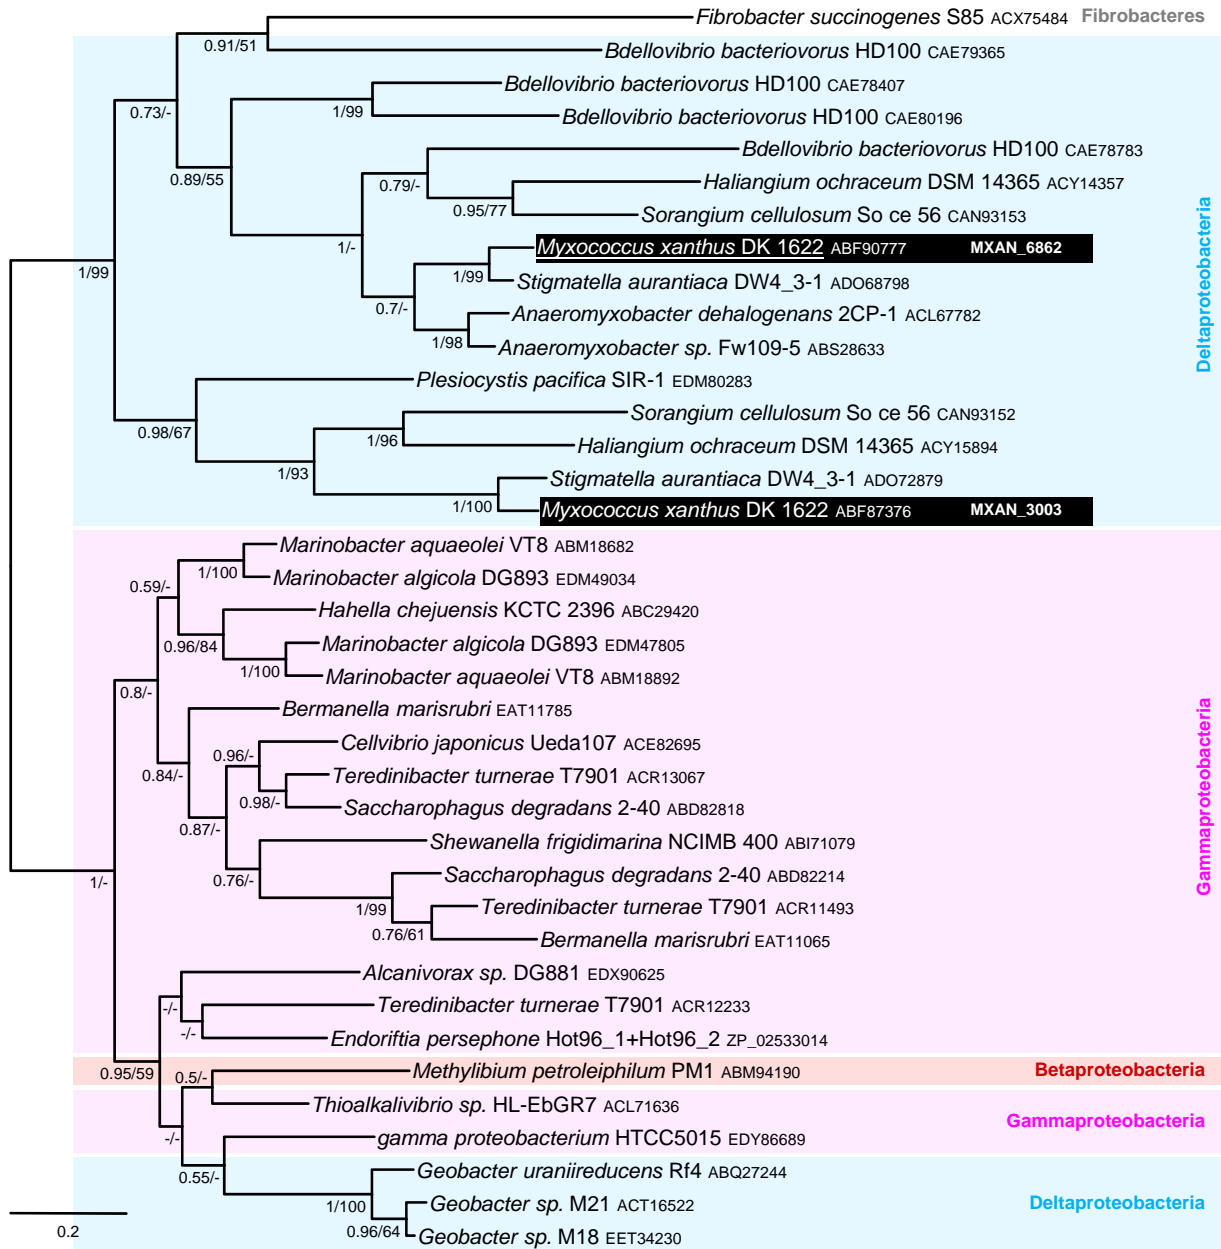

F

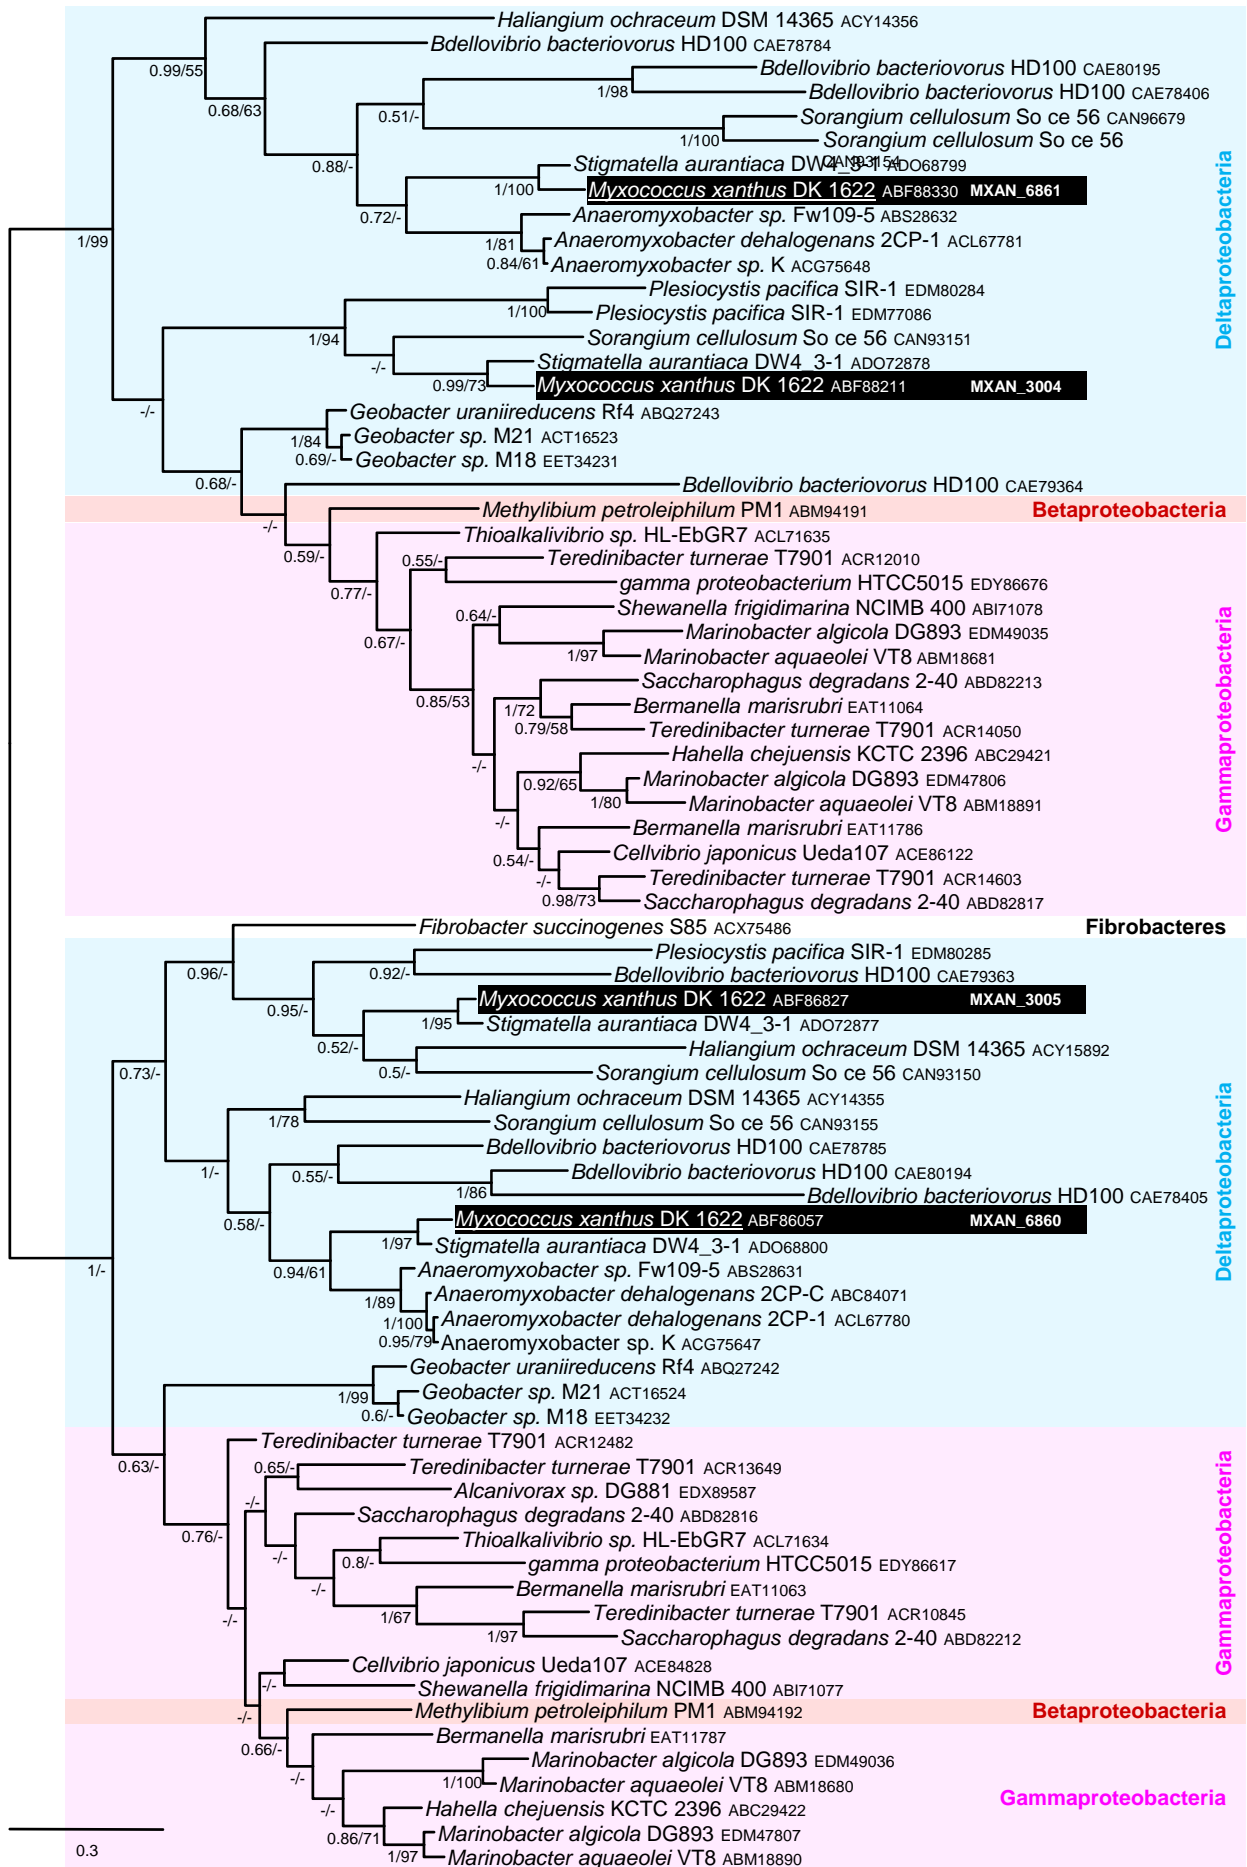

Supplement: pgen.1002268.s004.pdf [file pgen.1002268.s004.pdf]
