# Supplementary material for: Emergence and Modular Evolution of a Novel Motility Machinery in Bacteria
Source: PubMed Central journal article supplement (PMC3169522; doi:10.1371/journal.pgen.1002268), 2011-09-08

**WT**

**$\Omega$ MXAN1327**

**$\Omega$ MXAN1922**

**$\Omega$ *nfsD***

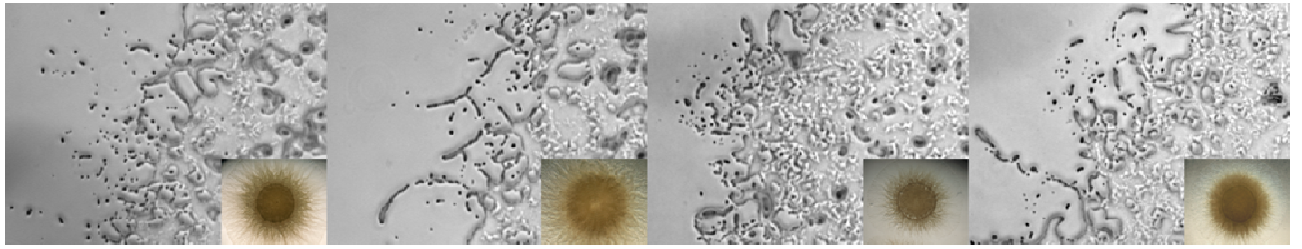

Supplement: pgen.1002268.s005.pdf [file pgen.1002268.s005.pdf]
