# Supplementary material for: Emergence and Modular Evolution of a Novel Motility Machinery in Bacteria
Source: PubMed Central journal article supplement (PMC3169522; doi:10.1371/journal.pgen.1002268), 2011-09-08
Supplement: pgen.1002268.s006.pdf [file pgen.1002268.s006.pdf]

**Table S1. List of the 23 and 35 *Myxococcus xanthus* genes identified by two transposon mutagenesis experiments (Yo = [16]; Yu = [17]).** For each gene, the locus\_tag in the genome of *M. xanthus*, the accession number of the corresponding protein in the ref\_seq database and the original functional annotation are provided. For each protein, we indicated the presence of functional conserved domains, of signal peptide and of transmembrane domains. \$ signs design false positive genes that have been removed from the current version of the *M. xanthus* genome. Asterisks correspond to the 28 genes fitting our criteria as putative components of the gliding machinery. Among them we showed that nine (in red) co-localize in three small genomic regions.

|       | Locus_tag/<br>Ref_seq          | Gene | Length (aa) | Former annotation                                                                                                                                   | Domain function (pfam)                                                                        | Signal peptide | Transmembrane domain |   |
|-------|--------------------------------|------|-------------|-----------------------------------------------------------------------------------------------------------------------------------------------------|-----------------------------------------------------------------------------------------------|----------------|----------------------|---|
| Yo    | (\$)                           | agmB | -           | ATP-dependent RNA helicase NP643917, <i>Xanthomonas axonopodis</i>                                                                                  | -                                                                                             | -              | -                    |   |
| Yo    | MXAN_0635/<br>YP_628903        | agmE | 319         | Soj/Par CAB16134, <i>Bacillus subtilis</i>                                                                                                          | CobQ/CobB/MinD/ParA nucleotide binding domain                                                 | no             | no                   |   |
| Yo    | MXAN_1673/<br>YP_629925        | agmN | 513         | Hypothetical protein BAB99656, <i>Corynebacterium glutamicum</i>                                                                                    | -                                                                                             | no             | no                   |   |
| Yo    | MXAN_2538/<br>YP_630757        | agmO | 170         | Proto-oncogene tyrosine-protein kinase c-ABL CAA34438, <i>Homo sapiens</i>                                                                          | -                                                                                             | yes            | no                   | * |
| Yo    | MXAN_2542/<br>YP_630761        | agmP | 427         | Multidrug resistance membrane protein, <i>Chlorobium tepidum</i>                                                                                    | Major Facilitator Superfamily                                                                 | no             | 10                   | * |
| Yo    | MXAN_2923/<br>YP_631134        | agmQ | 698         | Leucine aminopeptidase-ekated protein AAF96710, <i>Vibrio cholerae</i>                                                                              | Bacterial pre-peptidase C-terminal domain                                                     | no             | no                   |   |
| Yo    | MXAN_3352/<br>YP_631549        | agmF | 346         | Pseudouridylate synthase AAM24749, <i>Thermoanaerobacter tengcongensis</i>                                                                          | RNA pseudouridylate synthase                                                                  | no             | no                   |   |
| Yo    | MXAN_3502/<br>YP_631696        | agmI | 304         | Hypothetical protein ZP00079645, <i>Geobacter metallireducens</i>                                                                                   | Sporulation related domain                                                                    | no             | 1                    | * |
| Yo    | MXAN_3537/<br>YP_631730        | agmL | 432         | Isocitrate dehydrogenase BAB06878, <i>Bacillus halodurans</i>                                                                                       | socitrate/isopropylmalate dehydrogenase                                                       | no             | no                   |   |
| Yo    | MXAN_3842/<br>YP_632024        | agmD | 347         | tRNA synthetase CAB74224, <i>Campylobacter jejuni</i>                                                                                               | tRNA synthetases class I (W and Y)                                                            | no             | no                   |   |
| Yo    | MXAN_3886/<br>YP_632066        | agmA | 599         | N-acetylmuramoyl L-alanine amidase CAB73523, <i>Campylobacter jejuni</i>                                                                            | N-acetylmuramoyl-L-alanine amidase                                                            | yes            | no                   | * |
| Yo    | MXAN_4638/<br>YP_632804        | agmH | 279         | Lysophospholipase ANN50803, <i>Leptospira interrogans</i>                                                                                           | Putative lysophospholipase                                                                    | no             | no                   |   |
| Yo    | MXAN_4798/<br>YP_632959        | agmC | 1731        | Putative haemagglutinin/haemolysin-related protein CAD18331, <i>Ralstonia solanacearum</i>                                                          | Protein of unknown function (DUF3607)                                                         | no             | 1                    | * |
| Yo    | MXAN_4865/<br>AAO66319<br>(\$) | agmV | 1151        | No significant similarity                                                                                                                           | -                                                                                             | no             | no                   |   |
| Yo    | MXAN_4866/<br>YP_633027        | agIT | 478         | Predicted N-acetylglucosaminyl transferase (AGR99) AAH42083, <i>Homo sapiens</i>                                                                    | Tetratricopeptide repeat                                                                      | yes            | no                   | * |
| Yo    | MXAN_4870/<br>YP_633028        | agmU | 1218        | TPR-domain containing protein AAM05026, <i>Methanosarcina acetivorans</i>                                                                           | Tetratricopeptide repeat                                                                      | yes            | no                   | * |
| Yo    | MXAN_5715/<br>YP_633853        | agmZ | 399         | No significant similarity                                                                                                                           | Response regulator receiver domain<br>Histidine kinase-, DNA gyrase B-, and HSP90-like ATPase | no             | no                   |   |
| Yo    | MXAN_5744/<br>YP_633881        | agmW | 458         | Carboxy-terminal protease BAC45699, <i>Bradyrhizobium japonicum</i>                                                                                 | PDZ domain (Also known as DHR or GLGF)<br>Peptidase family S41                                | yes            | no                   | * |
| Yo    | MXAN_5753/<br>YP_633890        | aglX | 236         | TolQ biopolymer transport protein I64064, <i>Haemophilus influenza</i>                                                                              | MotA/TolQ/ExbB proton channel family                                                          | no             | 3                    | * |
| Yo    | MXAN_5754/<br>YP_633891        | aglV | 153         | ExbD/TolR AAM71873, <i>Chlorobium tepidum</i>                                                                                                       | Biopolymer transport protein ExbD/TolR                                                        | no             | 1                    | * |
| Yo    | MXAN_5756/<br>YP_633893        | aglW | 431         | TolB AAM71875, <i>C. tepidum</i>                                                                                                                    | TolB amino-terminal domain<br>WD40-like Beta Propeller Repeat                                 | yes            | no                   | * |
| Yo    | MXAN_5818/<br>YP_633955        | agmR | 371         | Putative ion transporting ATPase CAB45559, <i>Streptomyces coelicolor</i>                                                                           | Anion-transporting ATPase                                                                     | no             | no                   |   |
| Yo    | MXAN_5820/<br>YP_633957        | agmM | 360         | Putative metalloprotease C69831, <i>Bacillus subtilis</i>                                                                                           | Peptidase family M48                                                                          | no             | 5                    | * |
| Yo    | MXAN_6259/<br>YP_634388        | agmJ | 636         | ABC transporter BAB59028, <i>Penicillium digitatum</i>                                                                                              | Protein of unknown function (DUF2629)                                                         | no             | no                   |   |
| Yo    | MXAN_6519/<br>YP_634642        | agmG | 712         | Site-specific recombinase CAD14714, <i>Ralstonia solanacearum</i>                                                                                   | Site-specific recombinase                                                                     | no             | 7                    | * |
| Yo    | MXAN_6608/<br>YP_634726        | agmS | 263         | Enoyl-CoA hydratase AE011275, <i>Leptospira interrogans</i>                                                                                         | Enoyl-CoA hydratase/isomerase family                                                          | no             | no                   |   |
| Yo    | MXAN_6860/<br>YP_634977        | aglS | 194         | ExbD/TolR ACC45288, <i>Neisseria gonorrhoea</i>                                                                                                     | Biopolymer transport protein ExbD/TolR                                                        | no             | 1                    | * |
| Yo    | MXAN_6862/<br>YP_634979        | aglR | 245         | MotA/TolQ/ExbB proton channel AAM72811, <i>Chlorobium tepidum</i>                                                                                   | MotA/TolQ/ExbB proton channel family protein                                                  | no             | 3                    | * |
| Yo/Yu | MXAN_6607/<br>YP_634725        | agmT | 339         | Predicted periplasmic solute-binding protein ( <i>Trichodesmium erythraeum</i> )                                                                    | YceG-like family                                                                              | yes            | no                   | * |
| Yo/Yu | MXAN_1925/<br>YP_630169        | mgIA | 195         | SAR1-like small GTPase / GTPase Sar1p, CAA35978, <i>Saccharomyces cerevisiae</i>                                                                    | ADP-ribosylation factor family                                                                | no             | no                   |   |
| Yo/Yu | MXAN_1926/<br>YP_630170        | mgIB | 159         | Guanine nucleotide exchange factor for MglA / Ca2+ binding calreticulin AF340232, <i>Taenia solium</i> ; roadblock-LC7 domain                       | Roadblock/LC7 domain                                                                          | no             | no                   |   |
| Yo/Yu | MXAN_3008/<br>YP_631217        | aglU | 547         | WD-repeat lipoprotein, acylaminoacyl-peptidase / b-transducin-like protein HET-E2C AAL32799, <i>Podospira anserina</i> ; TolB <i>M. acetivorans</i> | WD40-like Beta Propeller Repeat                                                               | yes            | no                   | * |
| Yo/Yu | MXAN_3060/<br>YP_631268        | cglB | 416         | Outer membrane lipoprotein / No significant similarity                                                                                              | -                                                                                             | yes            | no                   | * |
| Yo/Yu | MXAN_4862/<br>YP_633021        | agmX | 674         | Outer membrane lipoprotein / Putative DnaJ-domain containing protein AC018929, <i>Oryza sativa</i>                                                  | -                                                                                             | no             | 1                    | * |
| Yo/Yu | MXAN_4863/<br>YP_633022        | agmK | 3822        | TPR repeat protein / TPR protein AAF31047, <i>Leishmania major</i>                                                                                  | Tetratricopeptide repeat                                                                      | no             | no                   | * |

|    | Locus_tag/<br>Ref_seq   | Gene | Lengh (aa) | Former annotation                                                                                              | Domain function (pfam)                                                                             | Signal peptide | Transmembrane domain |   |
|----|-------------------------|------|------------|----------------------------------------------------------------------------------------------------------------|----------------------------------------------------------------------------------------------------|----------------|----------------------|---|
| Yu | MXAN_2050/<br>YP_630279 | pglH | 927        | TPR repeat, CheY-like receiver domain, and a winged-helix DNA-binding domain                                   | Response regulator receiver domain                                                                 | no             | no                   |   |
| Yu | MXAN_2541/<br>YP_630760 | agnA | 673        | Unknown                                                                                                        | Tetratricopeptide repeat                                                                           | yes            | no                   | * |
| Yu | MXAN_2919/<br>YP_631130 | pglJ | 441        | Integral membrane protein similar to <i>S. coelicolor</i> gi:1098142 with local similarity to Wzy_C polymerase | O-Antigen ligase                                                                                   | no             | 8                    | * |
| Yu | MXAN_2921/<br>YP_631132 | pglB | 381        | Glycosyltransferase similar to YP_000604 of <i>Leptospira interrogans</i>                                      | Glycosyl transferases group 1                                                                      | no             | no                   |   |
| Yu | MXAN_4148/<br>YP_632323 | pglK | 302        | Predicted transmembrane transcriptional regulator                                                              | -                                                                                                  | no             | 1                    | * |
| Yu | MXAN_4616/<br>YP_632784 | pglF | 750        | Glycosyltransferase 1 domain and glycosyltransferase 2 domain                                                  | Starch synthase catalytic domain<br>Glycosyl transferases group 1<br>Glycosyl transferase family 2 | no             | no                   |   |
| Yu | MXAN_4710/<br>YP_632872 | pglN | 328        | ADP-heptose synthase, bifunctional sugar kinase/adenylyltransferase RfaE_like                                  | pfkB family carbohydrate kinase                                                                    | no             | no                   |   |
| Yu | MXAN_4867/<br>YP_633025 | pglI | 640        | Hypothetical abductin-like protein                                                                             | FHA domain<br>Gram-negative bacterial tonB protein                                                 | no             | 1                    | * |
| Yu | MXAN_5319/<br>YP_633470 | pglC | 841        | TPR repeat                                                                                                     | Tetratricopeptide repeat                                                                           | no             | no                   | * |
| Yu | MXAN_5382/<br>NC_008095 | aspT | 77pb       | tRNA-Asp                                                                                                       | tRNA-Asp                                                                                           |                |                      |   |
| Yu | MXAN_5585/<br>YP_633724 | pglE | 727        | Glycosyltransferase of PMT family                                                                              | Dolichyl-phosphate-mannose-protein mannosyltransferase                                             | yes            | 17                   | * |
| Yu | MXAN_6403/<br>YP_634527 | agnB | 408        | ABC-type transporter permease protein ( <i>Vibrio fischeri</i> )                                               | Predicted permease                                                                                 | yes            | 3                    | * |
| Yu | MXAN_6501/<br>YP_634624 | pglD | 354        | GDP-mannose synthesis                                                                                          | Nucleotidyl transferase<br>Mannose-6-phosphate isomerase                                           | no             | no                   |   |
| Yu | MXAN_7160/<br>YP_635273 | pglM | 409        | Alanine racemase                                                                                               | Alanine racemase, N-terminal domain<br>Alanine racemase, C-terminal domain                         | no             | no                   |   |
| Yu | MXAN_7252/<br>YP_635365 | pglA | 222        | Exopolysaccharide synthesis, ExoD                                                                              | Exopolysaccharide synthesis, ExoD                                                                  | no             | 3                    | * |
| Yu | MXAN_7296/<br>YP_635409 | agnC | 139        | Unknown                                                                                                        | Protein of unknown function (DUF3478)                                                              | no             | 1                    | * |
