# Supplementary material for: Emergence and Modular Evolution of a Novel Motility Machinery in Bacteria
Source: PubMed Central journal article supplement (PMC3169522; doi:10.1371/journal.pgen.1002268), 2011-09-08
Supplement: pgen.1002268.s007.pdf [file pgen.1002268.s007.pdf]

**Table S2.** List of complete genomes of Deltaproteobacteria, Gammaproteobacteria, Betaproteobacteria and Fibrobacteres carrying homologues of the 14 candidates genes coding for the gliding machinery in *M. xanthus*. For each genome, the accession number in the nucleic ref\_seq and in the GenBank databases, the size (in megabases) and the release date are provided.

| Genome                                     | Phylum              | Size  | GenBank    | Ref_Seq     | Released   |
|--------------------------------------------|---------------------|-------|------------|-------------|------------|
| <i>Anaeromyxobacter dehalogenans</i> 2CP-1 | Deltaproteobacteria | 5.02  | CP001359.1 | NC_011891.1 | 01/12/2009 |
| <i>Anaeromyxobacter dehalogenans</i> 2CP-C | Deltaproteobacteria | 5     | CP000251.1 | NC_007760.1 | 01/27/2006 |
| <i>Anaeromyxobacter</i> sp. Fw 109-5       | Deltaproteobacteria | 5.27  | CP000769.1 | NC_009675.1 | 07/17/2007 |
| <i>Anaeromyxobacter</i> sp. K              | Deltaproteobacteria | 5.06  | CP001131.1 | NC_011145.1 | 08/15/2008 |
| <i>Bdellovibrio bacteriovorus</i> HD100    | Deltaproteobacteria | 3.8   | BX842601.2 | NC_005363.1 | 01/31/2004 |
| <i>Geobacter</i> sp. M21                   | Deltaproteobacteria | 4.74  | CP001661.1 | NC_012918.1 | 06/20/2008 |
| <i>Geobacter uraniireducens</i> Rf4        | Deltaproteobacteria | 5.13  | CP000698.1 | NC_009483.1 | 05/11/2007 |
| <i>Haliangium ochraceum</i> DSM 14365      | Deltaproteobacteria | 9.4   | CP001804.1 | NC_013440.1 | 04/21/2009 |
| <i>Myxococcus xanthus</i> DK 1622          | Deltaproteobacteria | 9.13  | CP000113.1 | NC_008095.1 | 06/07/2006 |
| <i>Sorangium cellulosum</i> Soce56         | Deltaproteobacteria | 13.03 | AM746676.1 | NC_010162.1 | 11/27/2007 |
| <i>Stigmatella aurantiaca</i> DW4/3-1      | Deltaproteobacteria | 10    | CP002271.1 | NC_014623.1 | 10/21/2010 |
| <i>Fibrobacter succinogenes</i> S85        | Fibrobacteres       | 3.8   | CP002158   | -           | 08/06/2010 |
| <i>Methylibium petroleiphilum</i> PM1      | Betaproteobacteria  | 4.64  | CP000555.1 | NC_008825.1 | 01/29/2007 |
| <i>Cellvibrio japonicus</i> Ueda107        | Gammaproteobacteria | 4.57  | CP000934.1 | NC_010995.1 | 06/19/2008 |
| <i>Hahella chejuensis</i> KCTC 2396        | Gammaproteobacteria | 7.2   | CP000155.1 | NC_007645.1 | 12/14/2005 |
| <i>Marinobacter aquaeolei</i> VT8          | Gammaproteobacteria | 4.77  | CP000514.1 | NC_008740.1 | 12/28/2006 |
| <i>Saccharophagus degradans</i> 2-40       | Gammaproteobacteria | 5.05  | CP000282.1 | NC_007912.1 | 03/17/2006 |
| <i>Shewanella frigidimarina</i> NCIMB 400  | Gammaproteobacteria | 4.84  | CP000447.1 | NC_008345.1 | 09/14/2006 |
| <i>Teredinibacter turnerae</i> T7901       | Gammaproteobacteria | 5.2   | CP001614.2 | NC_012997.1 | 05/18/2009 |
| <i>Thioalkalivibrio</i> sp. HL-EbGR7       | Gammaproteobacteria | 3.46  | CP001339.1 | NC_011901.1 | 01/13/2009 |
