# Supplementary material for: Emergence and Modular Evolution of a Novel Motility Machinery in Bacteria
Source: PubMed Central journal article supplement (PMC3169522; doi:10.1371/journal.pgen.1002268), 2011-09-08
Supplement: pgen.1002268.s008.pdf [file pgen.1002268.s008.pdf]

**Table S3.** Exhaustive list of the homologues of the genes of the G1, G2 and M1 clusters found in complete genomes listed in Table S2. For each gene, the locus\_tag, and the accession number, the length and the functional annotation of the corresponding proteins according to the ref\_seq database are provided.

| Organism                                   | Locus_tag  | Ref_seq      | Lengh | Annotation                             | Homolog to |
|--------------------------------------------|------------|--------------|-------|----------------------------------------|------------|
| <i>Anaeromyxobacter dehalogenans 2CP-C</i> | Adeh_3310  | YP_466514    | 605   | zinc finger/thioredoxin putative       | MXAN_4862  |
|                                            | Adeh_3311  | YP_466515    | 4074  | TPR repeat-containing protein          | MXAN_4863  |
|                                            | Adeh_3318  | YP_466522    | 205   | hypothetical protein Adeh_3318         | MXAN_4866  |
|                                            | Adeh_3319  | YP_466523    | 673   | FHA domain-containing protein          | MXAN_4867  |
|                                            | Adeh_3320  | YP_466524    | 89    | hypothetical protein Adeh_3320         | MXAN_4868  |
|                                            | Adeh_3321  | YP_466525    | 453   | TPR repeat-containing protein          | MXAN_4869  |
|                                            | Adeh_3322  | YP_466526    | 1193  | TPR repeat-containing protein          | MXAN_4870  |
|                                            | Adeh_3323  | YP_466527    | 580   | hypothetical protein Adeh_3323         | MXAN_2541  |
|                                            | Adeh_3324  | YP_466528    | 261   | hypothetical protein Adeh_3324         | MXAN_2541  |
|                                            | Adeh_3325  | YP_466529    | 291   | hypothetical protein Adeh_3325         | MXAN_2539  |
|                                            | Adeh_3326  | YP_466530    | 139   | hypothetical protein Adeh_3326         | MXAN_2538  |
|                                            | Adeh_4308  | YP_467508    | 194   | adventurous gliding motility protein S | MXAN_6860  |
|                                            | Adeh_4309  | YP_467509    | 162   | ToIR protein                           | MXAN_6861  |
|                                            | Adeh_4310  | YP_467510    | 224   | MotA/TolQ/ExbB proton channel          | MXAN_6862  |
|                                            | A2cp1_3454 | YP_002493850 | 588   | MJ0042 family finger-like protein      | MXAN_4862  |
|                                            | A2cp1_3455 | YP_002493851 | 4104  | Tetratricopeptide TPR_2 repeat protein | MXAN_4863  |
|                                            | A2cp1_3462 | YP_002493858 | 205   | hypothetical protein A2cp1_3462        | MXAN_4866  |
|                                            | A2cp1_3463 | YP_002493859 | 680   | FHA domain containing protein          | MXAN_4867  |
|                                            | A2cp1_3464 | YP_002493860 | 89    | hypothetical protein A2cp1_3464        | MXAN_4868  |
|                                            | A2cp1_3465 | YP_002493861 | 451   | Tetratricopeptide TPR_2 repeat protein | MXAN_4869  |

|                                            |              |              |      |                                        |           |
|--------------------------------------------|--------------|--------------|------|----------------------------------------|-----------|
| <b>Anaeromyxobacter dehalogenans 2CP-1</b> | A2cp1_3466   | YP_002493862 | 1191 | TPR repeat-containing protein          | MXAN_4870 |
|                                            | A2cp1_3467   | YP_002493863 | 580  | hypothetical protein A2cp1_3467        | MXAN_2541 |
|                                            | A2cp1_3468   | YP_002493864 | 261  | hypothetical protein A2cp1_3468        | MXAN_2541 |
|                                            | A2cp1_3469   | YP_002493865 | 284  | hypothetical protein A2cp1_3469        | MXAN_2539 |
|                                            | A2cp1_3470   | YP_002493866 | 139  | hypothetical protein A2cp1_3470        | MXAN_2538 |
|                                            | A2cp1_4463   | YP_002494846 | 194  | Biopolymer transport protein ExbD/TolR | MXAN_6860 |
|                                            | A2cp1_4464   | YP_002494847 | 162  | Biopolymer transport protein ExbD/TolR | MXAN_6861 |
|                                            | A2cp1_4465   | YP_002494848 | 224  | MotA/TolQ/ExbB proton channel          | MXAN_6862 |
| <b>Anaeromyxobacter sp. FW 109-5</b>       | Anae109_3371 | YP_001380539 | 571  | Zinc finger-domain-containing protein  | MXAN_4862 |
|                                            | Anae109_3372 | YP_001380540 | 4095 | TPR repeat-containing protein          | MXAN_4863 |
|                                            | Anae109_3382 | YP_001380550 | 205  | hypothetical protein Anae109_3382      | MXAN_4866 |
|                                            | Anae109_3383 | YP_001380551 | 667  | FHA domain-containing protein          | MXAN_4867 |
|                                            | Anae109_3384 | YP_001380552 | 90   | hypothetical protein Anae109_3384      | MXAN_4868 |
|                                            | Anae109_3385 | YP_001380553 | 427  | TPR repeat-containing protein          | MXAN_4869 |
|                                            | Anae109_3386 | YP_001380554 | 1162 | TPR repeat-containing protein          | MXAN_4870 |
|                                            | Anae109_3387 | YP_001380555 | 649  | hypothetical protein Anae109_3387      | MXAN_2541 |
|                                            | Anae109_3388 | YP_001380556 | 254  | hypothetical protein Anae109_3388      | MXAN_2541 |
|                                            | Anae109_3389 | YP_001380557 | 285  | hypothetical protein Anae109_3389      | MXAN_2539 |
|                                            | Anae109_3390 | YP_001380558 | 172  | hypothetical protein Anae109_3390      | MXAN_2538 |
|                                            | Anae109_4453 | YP_001381615 | 194  | adventurous gliding motility protein S | MXAN_6860 |
|                                            | Anae109_4454 | YP_001381616 | 164  | TolR protein                           | MXAN_6861 |
|                                            | Anae109_4455 | YP_001381617 | 226  | MotA/TolQ/ExbB proton channel          | MXAN_6862 |
|                                            | AnaeK_3390   | YP_002135733 | 610  | MJ0042 family finger-like protein      | MXAN_4862 |
|                                            | AnaeK_3398   | YP_002135740 | 205  | hypothetical protein AnaeK_3398        | MXAN_4866 |
|                                            | AnaeK_3399   | YP_002135741 | 682  | FHA domain containing protein          | MXAN_4867 |

**Anaeromyxobacter sp. K**

|            |              |      |                                                 |           |
|------------|--------------|------|-------------------------------------------------|-----------|
| AnaeK_3400 | YP_002135742 | 89   | hypothetical protein AnaeK_3400                 | MXAN_4868 |
| AnaeK_3401 | YP_002135743 | 453  | Tetratricopeptide TPR_4                         | MXAN_4869 |
| AnaeK_3402 | YP_002135744 | 1192 | Tetratricopeptide TPR_2 repeat protein          | MXAN_4870 |
| AnaeK_3403 | YP_002135745 | 580  | hypothetical protein AnaeK_3403                 | MXAN_2541 |
| AnaeK_3404 | YP_002135746 | 261  | hypothetical protein AnaeK_3404                 | MXAN_2541 |
| AnaeK_3405 | YP_002135747 | 284  | hypothetical protein AnaeK_3405                 | MXAN_2539 |
| AnaeK_3406 | YP_002135748 | 139  | hypothetical protein AnaeK_3406                 | MXAN_2538 |
| AnaeK_4444 | YP_002136776 | 194  | adventurous gliding motility protein S          | MXAN_6860 |
| AnaeK_4445 | YP_002136777 | 162  | TolR protein                                    | MXAN_6861 |
| AnaeK_4446 | YP_002136778 | 224  | MotA/TolQ/ExbB proton channel                   | MXAN_6862 |
| Bd0413     | NP_967407    | 355  | hypothetical protein Bd0413                     | MXAN_2541 |
| Bd0414     | NP_967408    | 246  | hypothetical protein Bd0414                     | MXAN_2539 |
| Bd0416     | NP_967410    | 408  | hypothetical protein Bd0416                     | MXAN_4867 |
| Bd0417     | NP_967411    | 987  | hypothetical protein Bd0417                     | MXAN_4870 |
| Bd0418     | NP_967412    | 165  | hypothetical protein Bd0418                     | MXAN_6860 |
| Bd0419     | NP_967413    | 149  | putative adventurous gliding motility protein V | MXAN_6861 |
| Bd0420     | NP_967414    | 248  | putative adventurous gliding motility protein R | MXAN_6862 |
| Bd0828     | NP_967784    | 240  | hypothetical protein Bd0828                     | MXAN_2541 |
| Bd0829     | NP_967785    | 266  | hypothetical protein Bd0829                     | MXAN_2539 |
| Bd0831     | NP_967786    | 529  | hypothetical protein Bd0831                     | MXAN_2541 |
| Bd0832     | NP_967787    | 1066 | adventurous gliding motility protein U          | MXAN_4870 |
| Bd0833     | NP_967788    | 281  | adventurous gliding motility protein T          | MXAN_4869 |
| Bd0834     | NP_967789    | 707  | hypothetical protein Bd0834                     | MXAN_4867 |
| Bd0836     | NP_967790    | 221  | adventurous gliding motility protein R          | MXAN_6862 |
| Bd0837     | NP_967791    | 158  | tolR protein                                    | MXAN_6861 |

***Bdellovibrio bacteriovorus HD100***

|           |              |      |                                        |           |
|-----------|--------------|------|----------------------------------------|-----------|
| Bd0838    | NP_967792    | 196  | adventurous gliding motility protein S | MXAN_6860 |
| Bd1474    | NP_968365    | 713  | hypothetical protein Bd1474            | MXAN_2541 |
| Bd1475    | NP_968366    | 254  | hypothetical protein Bd1475            | MXAN_2539 |
| Bd1476    | NP_968367    | 488  | hypothetical protein Bd1476            | MXAN_4867 |
| Bd1477    | NP_968368    | 82   | hypothetical protein Bd1477            | MXAN_4868 |
| Bd1478    | NP_968369    | 1237 | adventurous gliding motility protein U | MXAN_4870 |
| Bd1479    | NP_968370    | 167  | adventurous gliding motility protein S | MXAN_6860 |
| Bd1480    | NP_968371    | 185  | ToIR-like protein, putative            | MXAN_6861 |
| Bd1481    | NP_968372    | 236  | adventurous gliding motility protein R | MXAN_6862 |
| Bd2369    | NP_969195    | 531  | hypothetical protein Bd2369            | MXAN_2541 |
| Bd2370    | NP_969196    | 235  | hypothetical protein Bd2370            | MXAN_2539 |
| Bd2372    | NP_969198    | 376  | hypothetical protein Bd2372            | MXAN_4867 |
| Bd2374    | NP_969200    | 996  | hypothetical protein Bd2374            | MXAN_4870 |
| Bd2375    | NP_969201    | 175  | adventurous gliding motility protein S | MXAN_6860 |
| Bd2376    | NP_969202    | 151  | hypothetical protein Bd2376            | MXAN_6861 |
| Bd2377    | NP_969203    | 244  | adventurous gliding motility protein R | MXAN_6862 |
| Bd3598    | NP_970322    | 278  | hypothetical protein Bd3598            | MXAN_2539 |
| Bd3599    | NP_970323    | 513  | hypothetical protein Bd3599            | MXAN_2541 |
| Bd3600    | NP_970324    | 52   | hypothetical protein Bd3600            | MXAN_4868 |
| Bd3601    | NP_970325    | 239  | hypothetical protein Bd3601            | MXAN_2541 |
| Gura_3070 | YP_001231814 | 484  | hypothetical protein Gura_3070         | MXAN_4867 |
| Gura_3071 | YP_001231815 | 166  | hypothetical protein Gura_3071         | MXAN_6860 |
| Gura_3072 | YP_001231816 | 166  | biopolymer transport protein ExbD/ToIR | MXAN_6861 |
| Gura_3073 | YP_001231817 | 211  | MotA/ToIQ/ExbB proton channel          | MXAN_6862 |
| Gura_3075 | YP_001231819 | 240  | TPR repeat-containing protein          | MXAN_4869 |

***Geobacter uraniireducens Rf4***

|                                 |                                              |              |              |                                        |                                        |
|---------------------------------|----------------------------------------------|--------------|--------------|----------------------------------------|----------------------------------------|
|                                 | Gura_3076                                    | YP_001231820 | 1108         | TPR repeat-containing protein          | MXAN_4870                              |
|                                 | Gura_3077                                    | YP_001231821 | 629          | hypothetical protein Gura_3077         | MXAN_2541                              |
| <b><i>Geobacter sp. M21</i></b> | GM21_0438                                    | YP_003020276 | 626          | hypothetical protein GM21_0438         | MXAN_2541                              |
|                                 | GM21_0439                                    | YP_003020277 | 1090         | Tetratricopeptide domain protein       | MXAN_4870                              |
|                                 | GM21_0440                                    | YP_003020278 | 272          | TPR repeat-containing protein          | MXAN_4869                              |
|                                 | GM21_0442                                    | YP_003020280 | 211          | MotA/TolQ/ExbB proton channel          | MXAN_6862                              |
|                                 | GM21_0443                                    | YP_003020281 | 166          | Biopolymer transport protein ExbD/ToIR | MXAN_6861                              |
|                                 | GM21_0444                                    | YP_003020282 | 165          | Biopolymer transport protein ExbD/ToIR | MXAN_6860                              |
|                                 | GM21_0445                                    | YP_003020283 | 505          | hypothetical protein GM21_0445         | MXAN_4867                              |
|                                 | <b><i>Haliangium ochraceum DSM 14365</i></b> | Hoch_1807    | YP_003266248 | 201                                    | Biopolymer transport protein ExbD/ToIR |
| Hoch_1808                       |                                              | YP_003266249 | 163          | Biopolymer transport protein ExbD/ToIR | MXAN_6861                              |
| Hoch_1809                       |                                              | YP_003266250 | 216          | MotA/TolQ/ExbB proton channel          | MXAN_6862                              |
| Hoch_2490                       |                                              | YP_003266919 | 560          | Tetratricopeptide repeat protein       | MXAN_2541                              |
| Hoch_2491                       |                                              | YP_003266920 | 1155         | Tetratricopeptide repeat protein       | MXAN_4870                              |
| Hoch_2492                       |                                              | YP_003266921 | 441          | Tetratricopeptide TPR_2 repeat protein | MXAN_4869                              |
| Hoch_3390                       |                                              | YP_003267785 | 187          | Biopolymer transport protein ExbD/ToIR | MXAN_6860                              |
| Hoch_3391                       |                                              | YP_003267786 | 242          | Biopolymer transport protein ExbD/ToIR | MXAN_6861                              |
| Hoch_3392                       |                                              | YP_003267787 | 223          | MotA/TolQ/ExbB proton channel          | MXAN_6862                              |
| Hoch_3957                       |                                              | YP_003268349 | 228          | hypothetical protein Hoch_3957         | MXAN_2539                              |
| Hoch_3958                       |                                              | YP_003268350 | 268          | hypothetical protein Hoch_3958         | MXAN_2541                              |
| Hoch_3960                       |                                              | YP_003268352 | 689          | hypothetical protein Hoch_3960         | MXAN_2541                              |
| Hoch_3961                       |                                              | YP_003268353 | 1058         | Tetratricopeptide TPR_2 repeat protein | MXAN_4870                              |
| Hoch_3962                       |                                              | YP_003268354 | 395          | Tetratricopeptide TPR_2 repeat protein | MXAN_4869                              |
| Hoch_3963                       |                                              | YP_003268355 | 185          | hypothetical protein Hoch_3963         | MXAN_4868                              |
| Hoch_3964                       |                                              | YP_003268356 | 474          | TonB family protein                    | MXAN_4867                              |

|           |              |      |                                              |           |
|-----------|--------------|------|----------------------------------------------|-----------|
| Hoch_5625 | YP_003269998 | 296  | Tetratricopeptide TPR_2 repeat protein       | MXAN_4869 |
| Hoch_5627 | YP_003269999 | 767  | FHA domain containing protein                | MXAN_4867 |
| Hoch_5628 | YP_003270000 | 84   | hypothetical protein Hoch_5628               | MXAN_4868 |
| Hoch_6494 | YP_003270856 | 823  | hypothetical protein Hoch_6494               | MXAN_2541 |
| Hoch_6495 | YP_003270857 | 1202 | Tetratricopeptide repeat protein             | MXAN_4870 |
| Hoch_6496 | YP_003270858 | 422  | hypothetical protein Hoch_6496               | MXAN_4869 |
| Hoch_6497 | YP_003270859 | 120  | hypothetical protein Hoch_6497               | MXAN_4868 |
| Hoch_6498 | YP_003270860 | 490  | hypothetical protein Hoch_6498               | MXAN_4867 |
| MXAN_1327 | YP_629584    | 1089 | TPR repeat-containing protein                | MXAN_4870 |
| MXAN_1328 | YP_629585    | 538  | hypothetical protein MXAN_1328               | MXAN_2541 |
| MXAN_1329 | YP_629586    | 246  | hypothetical protein MXAN_1329               | MXAN_2539 |
| MXAN_1330 | YP_629587    | 749  | FHA domain-containing protein                | MXAN_4867 |
| MXAN_1331 | YP_629588    | 162  | hypothetical protein MXAN_1331               | MXAN_4868 |
| MXAN_1919 | YP_630163    | 447  | hypothetical protein MXAN_1919               | MXAN_2541 |
| MXAN_1920 | YP_630164    | 91   | hypothetical protein MXAN_1920               | MXAN_4870 |
| MXAN_1921 | YP_630165    | 490  | TPR repeat-containing protein                | MXAN_4869 |
| MXAN_1922 | YP_630166    | 1111 | TPR repeat-containing protein                | MXAN_4868 |
| MXAN_1923 | YP_630167    | 809  | hypothetical protein MXAN_1923               | MXAN_4867 |
| MXAN_3003 | YP_631212    | 260  | MotA/TolQ/ExbB proton channel family protein | MXAN_6862 |
| MXAN_3004 | YP_631213    | 173  | hypothetical protein MXAN_3004               | MXAN_6861 |
| MXAN_3005 | YP_631214    | 193  | hypothetical protein MXAN_3005               | MXAN_6860 |
| MXAN_3371 | YP_631568    | 294  | hypothetical protein MXAN_3371               | MXAN_2541 |
| MXAN_3372 | YP_631569    | 442  | hypothetical protein MXAN_3372               | MXAN_2539 |
| MXAN_3373 | YP_631570.1  | 512  | hypothetical protein MXAN_3373               | MXAN_2541 |
| MXAN_3374 | YP_631571    | 1219 | TPR repeat-containing protein                | MXAN_4870 |

***Myxococcus xanthus DK622***

|                                           |            |              |      |                                                    |           |
|-------------------------------------------|------------|--------------|------|----------------------------------------------------|-----------|
|                                           | MXAN_3375  | YP_631572    | 499  | putative adventurous gliding protein T             | MXAN_4869 |
|                                           | MXAN_3376  | YP_631573    | 96   | hypothetical protein MXAN_3376                     | MXAN_4868 |
|                                           | MXAN_3377  | YP_631574    | 682  | FHA/TonB domain-containing protein                 | MXAN_4867 |
|                                           | MXAN_3378  | YP_631575    | 200  | hypothetical protein MXAN_3378                     | MXAN_4866 |
| <b><i>Sorangium cellulosum</i> Soce56</b> | sce2906    | YP_001613545 | 292  | hypothetical protein sce2906                       | MXAN_2541 |
|                                           | sce2907    | YP_001613546 | 308  | hypothetical protein sce2907                       | MXAN_2539 |
|                                           | sce2914    | YP_001613553 | 568  | hypothetical protein sce2914                       | MXAN_2541 |
|                                           | sce2915    | YP_001613554 | 1289 | hypothetical protein sce2915                       | MXAN_4870 |
|                                           | sce2916    | YP_001613555 | 497  | hypothetical protein sce2916                       | MXAN_4869 |
|                                           | sce2917    | YP_001613556 | 90   | hypothetical protein sce2917                       | MXAN_4868 |
|                                           | sce2918    | YP_001613557 | 681  | FHA domain-containing protein                      | MXAN_4867 |
|                                           | sce2920    | YP_001613559 | 1774 | TPR repeat-containing protein                      | MXAN_4863 |
|                                           | sce2921    | YP_001613560 | 2081 | TPR repeat-containing protein                      | MXAN_4863 |
|                                           | sce2991    | YP_001613630 | 202  | putative adventurous gliding motility protein      | MXAN_6860 |
|                                           | sce2992    | YP_001613631 | 187  | ToIR-like protein                                  | MXAN_6861 |
|                                           | sce2993    | YP_001613632 | 225  | adventurous gliding motility protein R             | MXAN_6862 |
|                                           | sce2994    | YP_001613633 | 220  | adventurous gliding motility protein R             | MXAN_6862 |
|                                           | sce2995    | YP_001613634 | 189  | putative biopolymer transport protein              | MXAN_6861 |
|                                           | sce2996    | YP_001613635 | 169  | putative adventurous gliding motility protein AgIS | MXAN_6860 |
|                                           | sce5940    | YP_001616584 | 511  | hypothetical protein sce5940                       | MXAN_4867 |
|                                           | sce5942    | YP_001616586 | 82   | hypothetical protein sce5942                       | MXAN_4868 |
|                                           | sce5943    | YP_001616587 | 449  | TPR domain-containing protein                      | MXAN_4869 |
|                                           | sce5944    | YP_001616588 | 1431 | hypothetical protein sce5944                       | MXAN_4870 |
|                                           | sce5945    | YP_001616589 | 802  | hypothetical protein sce5945                       | MXAN_2541 |
|                                           | STAUR_0994 | YP_003950625 | 246  | mota/tolq/exbb proton channel family protein       | MXAN_6862 |

*Stigmatella aurantiaca DW4/3-1*

|           |              |      |                                                |           |
|-----------|--------------|------|------------------------------------------------|-----------|
| STAU_0995 | YP_003950626 | 160  | biopolymer transport protein, exbd/tolr family | MXAN_6861 |
| STAU_0996 | YP_003950627 | 195  | adventurous gliding motility protein agls      | MXAN_6860 |
| STAU_1954 | YP_003951585 | 1091 | tetratricopeptide repeat protein               | MXAN_4870 |
| STAU_1955 | YP_003951586 | 520  | hypothetical protein STAU_1955                 | MXAN_2541 |
| STAU_1956 | YP_003951587 | 211  | hypothetical protein STAU_1956                 | MXAN_2539 |
| STAU_1957 | YP_003951588 | 745  | fha domain protein                             | MXAN_4867 |
| STAU_1958 | YP_003951589 | 133  | hypothetical protein STAU_1958                 | MXAN_4868 |
| STAU_2684 | YP_003952314 | 450  | hypothetical protein STAU_2684                 | MXAN_4867 |
| STAU_2685 | YP_003952315 | 82   | hypothetical protein STAU_2685                 | MXAN_4868 |
| STAU_2686 | YP_003952316 | 442  | tetratricopeptide repeat protein               | MXAN_4869 |
| STAU_2687 | YP_003952317 | 1109 | tetratricopeptide repeat protein               | MXAN_4870 |
| STAU_2688 | YP_003952318 | 785  | hypothetical protein STAU_2688                 | MXAN_2541 |
| STAU_3259 | YP_003952878 | 176  | adventurous gliding motility protein agmo      | MXAN_2538 |
| STAU_3260 | YP_003952879 | 274  | hypothetical protein STAU_3260                 | MXAN_2539 |
| STAU_3261 | YP_003952880 | 270  | hypothetical protein STAU_3261                 | MXAN_2541 |
| STAU_3262 | YP_003952881 | 674  | tetratricopeptide repeat domain protein        | MXAN_2541 |
| STAU_3837 | YP_003953452 | 273  | hypothetical protein STAU_3837                 | MXAN_2541 |
| STAU_3838 | YP_003953453 | 397  | hypothetical protein STAU_3838                 | MXAN_2539 |
| STAU_3839 | YP_003953454 | 511  | hypothetical protein STAU_3839                 | MXAN_2541 |
| STAU_3840 | YP_003953455 | 1209 | tetratricopeptide repeat protein               | MXAN_4870 |
| STAU_3841 | YP_003953456 | 479  | tetratricopeptide repeat family protein        | MXAN_4869 |
| STAU_3842 | YP_003953457 | 97   | hypothetical protein STAU_3842                 | MXAN_4868 |
| STAU_3843 | YP_003953458 | 641  | fha/tonb domain protein                        | MXAN_4867 |
| STAU_3845 | YP_003953460 | 198  | hypothetical protein STAU_3845                 | MXAN_4866 |
| STAU_5105 | YP_003954704 | 175  | hypothetical protein STAU_5105                 | MXAN_6860 |



|                                              |             |              |      |                                                 |           |
|----------------------------------------------|-------------|--------------|------|-------------------------------------------------|-----------|
|                                              | STAU_5106   | YP_003954705 | 172  | hypothetical protein STAU_5106                  | MXAN_6861 |
|                                              | STAU_5107   | YP_003954706 | 244  | mota/tolq/exbb proton channel family protein    | MXAN_6862 |
|                                              | STAU_5649   | YP_003955239 | 653  | adventurous gliding motility protein agmx       | MXAN_4862 |
|                                              | STAU_5650   | YP_003955240 | 4089 | adventurous gliding motility protein agmk       | MXAN_4863 |
|                                              | STAU_5652   | YP_003955242 | 211  | hypothetical protein STAU_5652                  | MXAN_4866 |
|                                              | STAU_5653   | YP_003955243 | 640  | fha domain/tonb domain protein                  | MXAN_4867 |
|                                              | STAU_5654   | YP_003955244 | 88   | hypothetical protein STAU_5654                  | MXAN_4868 |
|                                              | STAU_5655   | YP_003955245 | 474  | adventurous gliding protein t                   | MXAN_4869 |
|                                              | STAU_5656   | YP_003955246 | 1216 | tetratricopeptide repeat protein                | MXAN_4870 |
| <b><i>Fibrobacter succinogenes S85</i></b>   | Fiscuc_1892 | YP_003249964 | 746  | TPR repeat-containing protein                   | MXAN_2541 |
|                                              | Fiscuc_1893 | YP_003249965 | 1292 | TPR repeat-containing protein                   | MXAN_4870 |
|                                              | Fiscuc_1894 | YP_003249966 | 212  | MotA/TolQ/ExbB proton channel                   | MXAN_6862 |
|                                              | Fiscuc_1896 | YP_003249968 | 164  | Biopolymer transport protein ExbD/ToIR          | MXAN_6860 |
|                                              | Fiscuc_1897 | YP_003249969 | 308  | TonB family protein                             | MXAN_4867 |
| <b><i>Methylibium petroleiphilum PM1</i></b> | Mpe_A1224   | YP_001020421 | 634  | hypothetical protein Mpe_A1224                  | MXAN_2541 |
|                                              | Mpe_A1225   | YP_001020422 | 941  | hypothetical protein Mpe_A1225                  | MXAN_4870 |
|                                              | Mpe_A1226   | YP_001020423 | 243  | hypothetical protein Mpe_A1226                  | MXAN_4869 |
|                                              | Mpe_A1228   | YP_001020425 | 217  | putative adventurous gliding motility protein R | MXAN_6862 |
|                                              | Mpe_A1229   | YP_001020426 | 170  | hypothetical protein Mpe_A1229                  | MXAN_6861 |
|                                              | Mpe_A1230   | YP_001020427 | 163  | adventurous gliding motility protein S          | MXAN_6860 |
|                                              | Mpe_A1231   | YP_001020428 | 371  | hypothetical protein Mpe_A1231                  | MXAN_4867 |
| <b><i>Cellvibrio japonicus Ueda107</i></b>   | CJA_3312    | YP_001983766 | 323  | TonB family C-terminal domain protein           | MXAN_4867 |
|                                              | CJA_3313    | YP_001983767 | 173  | putative adventurous gliding motility protein S | MXAN_6860 |
|                                              | CJA_3314    | YP_001983768 | 181  | hypothetical protein CJA_3314                   | MXAN_6861 |
|                                              | CJA_3315    | YP_001983769 | 231  | adventurous gliding motility protein R          | MXAN_6862 |

|                                            |           |              |     |                                         |           |
|--------------------------------------------|-----------|--------------|-----|-----------------------------------------|-----------|
|                                            | CJA_3317  | YP_001983771 | 244 | putative TPR domain protein             | MXAN_4869 |
|                                            | CJA_3318  | YP_001983772 | 964 | tetratricopeptide repeat domain protein | MXAN_4870 |
|                                            | CJA_3319  | YP_001983773 | 660 | hypothetical protein CJA_3319           | MXAN_2541 |
| <b><i>Hahella chejuensis</i> KCTC 2396</b> | HCH_02601 | YP_433818    | 640 | TPR repeat-containing protein           | MXAN_4869 |
|                                            | HCH_02602 | YP_433819    | 963 | hypothetical protein HCH_02602          | MXAN_4870 |
|                                            | HCH_02603 | YP_433820    | 203 | TPR repeat-containing protein           | MXAN_4869 |
|                                            | HCH_02626 | YP_433841    | 584 | TPR repeat-containing protein           | MXAN_2541 |
|                                            | HCH_02627 | YP_433842    | 933 | hypothetical protein HCH_02627          | MXAN_4870 |
|                                            | HCH_02628 | YP_433843    | 197 | TPR repeat-containing protein           | MXAN_4869 |
|                                            | HCH_02631 | YP_433845    | 221 | biopolymer transport protein            | MXAN_6862 |
|                                            | HCH_02632 | YP_433846    | 170 | hypothetical protein HCH_02632          | MXAN_6861 |
|                                            | HCH_02633 | YP_433847    | 165 | biopolymer transport protein            | MXAN_6860 |
|                                            | HCH_02634 | YP_433848    | 334 | hypothetical protein HCH_02634          | MXAN_4867 |
| <b><i>Marinobacter aquaeolei</i> VT8</b>   | Maqu_1595 | YP_958866    | 321 | hypothetical protein Maqu_1595          | MXAN_4867 |
|                                            | Maqu_1596 | YP_958867    | 162 | biopolymer transport protein            | MXAN_6860 |
|                                            | Maqu_1597 | YP_958868    | 176 | biopolymer transport protein ExbD/TolR  | MXAN_6861 |
|                                            | Maqu_1598 | YP_958869    | 221 | MotA/TolQ/ExbB proton channel           | MXAN_6862 |
|                                            | Maqu_1600 | YP_958871    | 162 | TPR repeat-containing protein           | MXAN_4869 |
|                                            | Maqu_1601 | YP_958872    | 939 | TPR repeat-containing protein           | MXAN_4870 |
|                                            | Maqu_1602 | YP_958873    | 550 | hypothetical protein Maqu_1602          | MXAN_2541 |
|                                            | Maqu_1807 | YP_959076    | 324 | hypothetical protein Maqu_1807          | MXAN_4867 |
|                                            | Maqu_1808 | YP_959077    | 166 | biopolymer transport protein ExbD/TolR  | MXAN_6860 |
|                                            | Maqu_1809 | YP_959078    | 170 | biopolymer transport protein ExbD/TolR  | MXAN_6861 |
|                                            | Maqu_1810 | YP_959079    | 235 | MotA/TolQ/ExbB proton channel           | MXAN_6862 |
|                                            | Maqu_1812 | YP_959081    | 189 | TPR repeat-containing protein           | MXAN_4869 |

|                                             |                                                  |              |           |                                                |                                |
|---------------------------------------------|--------------------------------------------------|--------------|-----------|------------------------------------------------|--------------------------------|
|                                             | Maqu_1813                                        | YP_959082    | 952       | TPR repeat-containing protein                  | MXAN_4870                      |
|                                             | Maqu_1814                                        | YP_959083    | 648       | TPR repeat-containing protein                  | MXAN_2541                      |
| <b><i>Saccharophagus degradans 2-40</i></b> | Sde_2954                                         | YP_528423    | 325       | hypothetical protein Sde_2954                  | MXAN_4867                      |
|                                             | Sde_2955                                         | YP_528424    | 185       | hypothetical protein Sde_2955                  | MXAN_6860                      |
|                                             | Sde_2956                                         | YP_528425    | 169       | hypothetical protein Sde_2956                  | MXAN_6861                      |
|                                             | Sde_2957                                         | YP_528426    | 242       | biopolymer transport proteins-like             | MXAN_6862                      |
|                                             | Sde_2959                                         | YP_528428    | 230       | cellulose binding, type IV                     | MXAN_4869                      |
|                                             | Sde_2960                                         | YP_528429    | 952       | cellulose binding, type IV                     | MXAN_4870                      |
|                                             | Sde_2961                                         | YP_528430    | 570       | hypothetical protein Sde_2961                  | MXAN_2541                      |
|                                             | Sde_3560                                         | YP_529027    | 325       | hypothetical protein Sde_3560                  | MXAN_4867                      |
|                                             | Sde_3561                                         | YP_529028    | 178       | sigma-70 factor                                | MXAN_6860                      |
|                                             | Sde_3562                                         | YP_529029    | 183       | hypothetical protein Sde_3562                  | MXAN_6861                      |
|                                             | Sde_3563                                         | YP_529030    | 220       | ATPase                                         | MXAN_6862                      |
|                                             | Sde_3565                                         | YP_529032    | 222       | hypothetical protein Sde_3565                  | MXAN_4869                      |
|                                             | Sde_3566                                         | YP_529033    | 957       | coenzyme A biosynthesis protein                | MXAN_4870                      |
|                                             | Sde_3567                                         | YP_529034    | 624       | hypothetical protein Sde_3567                  | MXAN_2541                      |
|                                             | <b><i>Shewanella frigidimarina NCIMB 400</i></b> | Sfri_1223    | YP_749914 | 332                                            | hypothetical protein Sfri_1223 |
| Sfri_1224                                   |                                                  | YP_749915    | 177       | sigma-70 factor                                | MXAN_6860                      |
| Sfri_1225                                   |                                                  | YP_749916    | 188       | hypothetical protein Sfri_1225                 | MXAN_6861                      |
| Sfri_1226                                   |                                                  | YP_749917    | 217       | MotA/TolQ/ExbB proton channel                  | MXAN_6862                      |
| Sfri_1228                                   |                                                  | YP_749919    | 263       | TPR repeat-containing protein                  | MXAN_4869                      |
| Sfri_1229                                   |                                                  | YP_749920    | 1016      | TPR repeat-containing protein                  | MXAN_4870                      |
| Sfri_1230                                   |                                                  | YP_749921    | 692       | hypothetical protein Sfri_1230                 | MXAN_2541                      |
|                                             | TERTU_1670                                       | YP_003073195 | 205       | MotA/TolQ/ExbB proton channel                  | MXAN_6862                      |
|                                             | TERTU_1671                                       | YP_003073196 | 173       | transport energizing protein, ExbD/TolR family | MXAN_6861                      |

|                                      |                                      |              |              |                                                   |                                |
|--------------------------------------|--------------------------------------|--------------|--------------|---------------------------------------------------|--------------------------------|
| <i>Teredinibacter turnerae</i> T7901 | TERTU_1672                           | YP_003073197 | 165          | hypothetical protein TERTU_1672                   | MXAN_6860                      |
|                                      | TERTU_1849                           | YP_003073348 | 552          | hypothetical protein TERTU_1849                   | MXAN_2541                      |
|                                      | TERTU_1850                           | YP_003073349 | 947          | TPR repeat domain protein                         | MXAN_4870                      |
|                                      | TERTU_1851                           | YP_003073350 | 212          | tetratricopeptide repeat domain protein           | MXAN_4869                      |
|                                      | TERTU_1853                           | YP_003073352 | 272          | transporter, MotA/TolQ/ExbB proton channel family | MXAN_6862                      |
|                                      | TERTU_1854                           | YP_003073353 | 170          | hypothetical protein TERTU_1854                   | MXAN_6861                      |
|                                      | TERTU_1855                           | YP_003073354 | 178          | hypothetical protein TERTU_1855                   | MXAN_6860                      |
|                                      | TERTU_1856                           | YP_003073355 | 321          | hypothetical protein TERTU_1856                   | MXAN_4867                      |
|                                      | TERTU_3740                           | YP_003075049 | 325          | TonB domain protein                               | MXAN_4867                      |
|                                      | TERTU_3741                           | YP_003075050 | 176          | hypothetical protein TERTU_3741                   | MXAN_6860                      |
|                                      | TERTU_3742                           | YP_003075051 | 183          | hypothetical protein TERTU_3742                   | MXAN_6861                      |
|                                      | TERTU_3743                           | YP_003075052 | 245          | ATPase                                            | MXAN_6862                      |
|                                      | TERTU_3745                           | YP_003075054 | 225          | tetratricopeptide repeat protein                  | MXAN_4869                      |
|                                      | TERTU_3746                           | YP_003075055 | 964          | TPR repeat domain protein                         | MXAN_4870                      |
|                                      | TERTU_3747                           | YP_003075056 | 640          | tetratricopeptide repeat domain protein           | MXAN_2541                      |
|                                      | <i>Thioalkalivibrio</i> sp. HL-EbGR7 | Tgr7_0536    | YP_002512620 | 535                                               | hypothetical protein Tgr7_0536 |
| Tgr7_0537                            |                                      | YP_002512621 | 170          | sigma-70 factor                                   | MXAN_6860                      |
| Tgr7_0538                            |                                      | YP_002512622 | 168          | hypothetical protein Tgr7_0538                    | MXAN_6861                      |
| Tgr7_0539                            |                                      | YP_002512623 | 222          | MotA/TolQ/ExbB proton channel                     | MXAN_6862                      |
| Tgr7_0541                            |                                      | YP_002512625 | 190          | TPR repeat-containing protein                     | MXAN_4869                      |
| Tgr7_0542                            |                                      | YP_002512626 | 922          | hypothetical protein Tgr7_0542                    | MXAN_4870                      |
| Tgr7_0543                            |                                      | YP_002512627 | 620          | hypothetical protein Tgr7_0543                    | MXAN_2541                      |
