# Supplementary material for: Emergence and Modular Evolution of a Novel Motility Machinery in Bacteria
Source: PubMed Central journal article supplement (PMC3169522; doi:10.1371/journal.pgen.1002268), 2011-09-08
Supplement: pgen.1002268.s009.pdf [file pgen.1002268.s009.pdf]

Table S4. Primers

| Name            | Sequences of primers (5'---3')     |
|-----------------|------------------------------------|
| 1922-1          | AAAGAATTCTGGTACGAGAAGAACAAGGGC     |
| 1922-2          | AAAAAGCTTGTAGATGCGCTCGTACAGCTTC    |
| 3374-1          | AAAGAATTCCAGTTGGTCCGCAAGGAAATG     |
| 3374-2          | AAAAAGCTTCTTCTTCGGGTCTTCTCCTTC     |
| INS1327-1       | CCCAAGCTTTGGAGAAGAGCCGCTACG        |
| INS1327-2       | CGGGATCCCGTCGTAGAGCTTCTGG          |
| DAGMU7          | AAAGAATTCACGCCTCGCCATTTCGC         |
| DAGMU8          | AAAGGTACCCATGGTCTTCTAGGAGAGGGGC    |
| DAGMU9          | AAAGGTACCAAGACTCAGGTGGACGCC        |
| DAGMU10         | AAAAAGCTTCTGGCCCATGCCCTTGTA        |
| DAGLT1          | AAGAATTCGAACGAGTACCGGCGCC          |
| DAGLT5          | AAAGGATCCTGGCCTTGGAGGACGTAC        |
| DAGLT6          | AAAGGATCCCCGACCAGAAGAATGCAGG       |
| DAGLT4          | TTAAGCTTCCGTTGACGTACGTGCCC         |
| D4868-1         | AAGAATTCGCGAGCTCCACCACG            |
| D4868-5         | AAAGGATCCTCACAGCAGGTCGTCTTCC       |
| D4868-6         | AAAGGATCCTAGCCAGCGCCACAACGC        |
| D4868-4         | TTAAGCTTCGAAGGCCCTTCCTAC           |
| D4867-1         | AAGAATTCGAAGCGCGAGGCCAAG           |
| D4867-5         | AAAGGATCCGTCCTTGGAGGCGACCAG        |
| D4867-6         | AAAGGATCCCGTGGTGGTCGTACGTATC       |
| D4867-4         | TTAAGCTTACGTCTTCTCCCGCTAGAAC       |
| D4866-1         | AAGAATTCACCCGAACAAGAAGGACGAG       |
| D4866-2         | GCGGTCCTGACGTTGGC                  |
| D4866-3         | CAACGTCAGGACCGCCGGGAGAAAGACGTGCCTC |
| D4866-4         | TTAAGCTTTCCTCGGCCTCGGGAC           |
| 4866-4          | AAATCTAGACGCCGGGTGGCCTTTC          |
| 4866-5          | AAAAAGCTTGAATCCGTCTTGGAGAGCGC      |
| D4866-4         | TTAAGCTTTCCTCGGCCTCGGGAC           |
| D2541-1         | GGAATTCCTCGGCGCTGCCGGGGCGAG        |
| D2541-2         | CGGGATCCGGCGACGCGGATGAGCCGGA       |
| D2541-3         | CGGGATCCGGACCCGGGACTTCTCCCCC       |
| D2541-4         | CCCAAGCTTGCGCCTCGCGCCCTGGCGCG      |
| PROM4868-1      | CCCAAGCTTCGACGCCGGCTTCCGGCACGG     |
| 4868-SANSSTOP-2 | CAGCTCGCCACGGACTGCATCACCTTG        |
| 4868-MCHERRY-3  | GTCCGTGGGCGAGCTGGTGAGCAAGGGCGAGGAG |
| MCHERRY-4       | CGGGATCCTTACTTGTACAGCTCGTCCATGCCG  |
| PROM4867-BAMHI  | CGCGGATCCATGCAGTCCGTGGG            |
| 4867-ECORI-4    | CGGAATTCCCAGCGCTATTCGCCG           |
| 2539-1          | CGGAATTCAACCAGTCGCGCGGAAAGG        |
| 2539-2          | GCTCTAGACTGGGCGGATGCCAGTGC         |
| 2539-3          | GCTCTAGAGCAGGCATCTCGCTGTTCC        |
| 2539-4          | CCCAAGCTTAGGCCCTCGAAGTTCTGC        |
| 2540-1          | CGGAATTCTTTGAACCGCCCCAAGTTGCTGC    |
| 2540-2          | GCTCTAGATTCCGGTGGTCTGGGCGAAGC      |
| 2540-3          | GCTCTAGACTGCGCAACCAGCTCCTGTTCG     |
| 2540-4          | CCCAAGCTTTTGTGCGGCTTCTCGGGCTG      |
| 2538-1          | CGGAATTCTACTCGGCGAAGGCTGCATCAGG    |
| 2538-2          | GCTCTAGACGGACGTTCCGGCGAGAACAAC     |
| 2538-3          | GCTCTAGACATGAGGGCGGTTCCGACGAAC     |
| 2538-4          | CCCAAGCTTGTAGCCGTCGAAGTGGAGGATGG   |
| AGMU-QT1        | CACGAAGATCGTCCAGGAG                |
| AGMU-QT2        | GCCATCCTCCATGAGGTAC                |
| AGLT-QT1        | CGTCAGGCCTCTGAGAACC                |
| AGLT-QT2        | GGAGCACCTCCTGGTACAG                |
| 4868-QT1        | GAAGACGACCTGCTGTGAAAG              |

---

|          |                             |
|----------|-----------------------------|
| 4868-QT2 | GAAACACAAGGTTTCGCATC        |
| 4867-QT1 | GCCGTTCCCTCTGACACTC         |
| 4867-QT2 | GAGACGGCCAATCTTGATG         |
| 4866-QT1 | GTGCGCTTCGTTTCGTTCTC        |
| 4866-QT2 | CGATTTTCATCGAACGTGAC        |
| AGMO-QT1 | CGCTCCTGTTGGGTGGCT          |
| AGMO-QT2 | GGAGTTGTTGTTGGCCGC          |
| 2539-QT3 | CCTGTGTCTGGTGCCCGC          |
| 2539-QT4 | GCATCCTGCGATGACTCGG         |
| 2540-QT3 | CCACCGAAGAGGCGGAAG          |
| 2540-QT4 | GGAAGACGTGGCCGGAG           |
| 2541-QT1 | GTGGACGGCCCCACCTA           |
| 2541-QT2 | GGTGGGCTTCTTCTTGGG          |
| 4867-O1  | GCTCTAGACGCCGTTCCCTGACACTC  |
| 4867-O2  | GGAATTCCTATTCGCCGACTGCTTG   |
| GMOA-O1  | CCCAAGCTTGGACCTGGCGTCTGTGAC |
| GMOA-O2  | GGAATTCTCCTCCTCGTCGCGAG     |

---
