# Supplementary material for: Emergence and Modular Evolution of a Novel Motility Machinery in Bacteria
Source: PubMed Central journal article supplement (PMC3169522; doi:10.1371/journal.pgen.1002268), 2011-09-08
Supplement: pgen.1002268.s010.pdf [file pgen.1002268.s010.pdf]

Table S5. Plasmids

| Name          | Description                                                                                  | Source              |
|---------------|----------------------------------------------------------------------------------------------|---------------------|
| pBJ114        | Used to create deletions, <i>galK</i> , Km <sup>R</sup>                                      | [23]                |
| pSWU30        | Tet <sup>R</sup> used to integrate genes ectopically at Mx8 <sub>att</sub>                   | L. Sogaard-Andersen |
| pBJAglZY      | pBJ114 with a cassette allowing construction of the <i>aglZ-yfp</i> chimeric gene            | [12]                |
| pBJΩMxan_1922 | pBJ114 with an insertion cassette for Mxan_1922                                              | This work           |
| pBJΩMxan_3374 | pBJ114 with an insertion cassette for Mxan_3374                                              | This work           |
| pBJΩMxan_1327 | pBJ114 with an insertion cassette for Mxan_1327                                              | This work           |
| pBJΔglD       | pBJ114 with a deletion cassette for <i>glD</i>                                               | This work           |
| pBJΔglE       | pBJ114 with a deletion cassette for <i>glE</i>                                               | This work           |
| pBJΔglF       | pBJ114 with a deletion cassette for <i>glF</i>                                               | This work           |
| pBJΔglG       | pBJ114 with a deletion cassette for <i>glG</i>                                               | This work           |
| pBJΔglH       | pBJ114 with a deletion cassette for <i>glH</i>                                               | This work           |
| pBJΔglC       | pBJ114 with a deletion cassette for <i>glC</i>                                               | This work           |
| pBJΔglK       | pBJ114 with a deletion cassette for <i>glK</i>                                               | This work           |
| pBJΔglB       | pBJ114 with a deletion cassette for <i>glB</i>                                               | This work           |
| pBJΔglA       | pBJ114 with a deletion cassette for <i>glA</i>                                               | This work           |
| pBJΔpilA      | pBJ114 with a deletion cassette for <i>pilA</i>                                              | Laboratory stock    |
| pBJΔaglQ      | pBJ114 with a deletion cassette for <i>aglQ</i>                                              | [13]                |
| pSWU30glG     | pSWU30 allowing expression of <i>glG</i> from its own promoter at Mx8 <sub>att</sub>         | This work           |
| pSWU30glFC    | pSWU30 allowing expression of <i>glF-mCherry</i> from its own promoter at Mx8 <sub>att</sub> | This work           |
| pKT25         | Bacterial two-hybrid T25 donor plasmid                                                       | Euromedex           |
| pUT18         | Bacterial two-hybrid T18 donor plasmid                                                       | Euromedex           |
| pUT18AglR     | AglR-T18 fusion donor construct                                                              | This work           |
| pKT25GltG     | GltG-T25 fusion donor construct                                                              | This work           |
