# Supplementary material for: Emergence and Modular Evolution of a Novel Motility Machinery in Bacteria
Source: PubMed Central journal article supplement (PMC3169522; doi:10.1371/journal.pgen.1002268), 2011-09-08
Supplement: pgen.1002268.s011.pdf [file pgen.1002268.s011.pdf]

| Table S6. <i>Myxococcus</i> strains |                                                            |                       |                                                    |
|-------------------------------------|------------------------------------------------------------|-----------------------|----------------------------------------------------|
| Strain                              | Construction                                               | Source                | Genotype                                           |
| DZ2                                 | Wild type                                                  | Laboratory collection | WT                                                 |
| TM156                               | DZ2 <i>pilA::tet</i>                                       | Laboratory collection | $\Omega pilA$                                      |
| TM267                               | DZ2 <i>frzE::Tn5</i> $\Omega 231$                          | David Zusman          | $\Omega frzE$                                      |
| DZ4770                              | DZ2 $\Delta aglZ$                                          | [24]                  | $\Delta aglZ$                                      |
| TM140                               | DZ2 pBJ $\Omega$ Mxan_1922                                 | This work             | $\Omega Mxan_{1922}$                               |
| TM141                               | DZ2 pBJ $\Omega$ Mxan_3374                                 | This work             | $\Omega Mxan_{3374}$                               |
| TM643                               | DZ2 pBJ $\Omega$ Mxan_1327                                 | This work             | $\Omega Mxan_{1327}$                               |
| TM142                               | DZ2 $\Delta gltD$ (pBJ $\Delta gltD$ )                     | This work             | $\Delta gltD$                                      |
| TM148                               | DZ2 $\Delta gltE$ (pBJ $\Delta gltE$ )                     | This work             | $\Delta gltE$                                      |
| TM136                               | DZ2 $\Delta gltF$ (pBJ $\Delta gltF$ )                     | This work             | $\Delta gltF$                                      |
| TM135                               | DZ2 $\Delta gltG$ (pBJ $\Delta gltG$ )                     | This work             | $\Delta gltG$                                      |
| TM149                               | DZ2 $\Delta gltH$ (pBJ $\Delta gltH$ )                     | This work             | $\Delta gltH$                                      |
| TM456                               | DZ2 $\Delta gltC$ (pBJ $\Delta gltC$ )                     | This work             | $\Delta gltC$                                      |
| TM600                               | DZ2 $\Delta gltK$ (pBJ $\Delta gltK$ )                     | This work             | $\Delta gltK$                                      |
| TM603                               | DZ2 $\Delta gltB$ (pBJ $\Delta gltB$ )                     | This work             | $\Delta gltB$                                      |
| TM606                               | DZ2 $\Delta gltA$ (pBJ $\Delta gltA$ )                     | This work             | $\Delta gltA$                                      |
| TM253                               | TM142 <i>pilA::tet</i>                                     | This work             | $\Delta gltD \Omega pilA$                          |
| TM297                               | TM148 <i>pilA::tet</i>                                     | This work             | $\Delta gltE \Omega pilA$                          |
| TM246                               | TM136 <i>pilA::tet</i>                                     | This work             | $\Delta gltF \Omega pilA$                          |
| TM245                               | TM135 <i>pilA::tet</i>                                     | This work             | $\Delta gltG \Omega pilA$                          |
| TM244                               | TM149 <i>pilA::tet</i>                                     | This work             | $\Delta gltH \Omega pilA$                          |
| TM466                               | TM456 <i>pilA::tet</i>                                     | This work             | $\Delta gltC \Omega pilA$                          |
| TM602                               | TM600 <i>pilA::tet</i>                                     | This work             | $\Delta gltK \Omega pilA$                          |
| TM605                               | TM603 <i>pilA::tet</i>                                     | This work             | $\Delta gltB \Omega pilA$                          |
| TM608                               | TM606 <i>pilA::tet</i>                                     | This work             | $\Delta gltA \Omega pilA$                          |
| TM274                               | TM142 <i>frzE::Tn5</i> $\Omega 231$                        | This work             | $\Delta gltD \Omega frzE$                          |
| TM275                               | TM148 <i>frzE::Tn5</i> $\Omega 231$                        | This work             | $\Delta gltE \Omega frzE$                          |
| TM276                               | TM136 <i>frzE::Tn5</i> $\Omega 231$                        | This work             | $\Delta gltF \Omega frzE$                          |
| TM277                               | TM135 <i>frzE::Tn5</i> $\Omega 231$                        | This work             | $\Delta gltG \Omega frzE$                          |
| TM293                               | TM149 <i>frzE::Tn5</i> $\Omega 231$                        | This work             | $\Delta gltH \Omega frzE$                          |
| TM467                               | TM456 <i>frzE::Tn5</i> $\Omega 231$                        | This work             | $\Delta gltC \Omega frzE$                          |
| TM601                               | TM600 <i>frzE::Tn5</i> $\Omega 231$                        | This work             | $\Delta gltK \Omega frzE$                          |
| TM604                               | TM603 <i>frzE::Tn5</i> $\Omega 231$                        | This work             | $\Delta gltB \Omega frzE$                          |
| TM607                               | TM606 <i>frzE::Tn5</i> $\Omega 231$                        | This work             | $\Delta gltA \Omega frzE$                          |
| TM330                               | DZ4770 <i>frzE::Tn5</i> $\Omega 231$                       | This work             | $\Delta aglZ \Omega frzE$                          |
| TM392                               | TM330 $\Delta pilA$ (pBJ $\Delta pilA$ )                   | This work             | $\Delta aglZ \Delta pilA \Omega frzE$              |
| TM445                               | TM274 $\Delta pilA$ (pBJ $\Delta pilA$ )                   | This work             | $\Delta gltD \Delta pilA \Omega frzE$              |
| TM248                               | TM135 <i>mx8<sub>ant</sub>::gltG</i> (pSWU30gltG)          | This work             | $\Delta gltG gltG$                                 |
| TM273                               | TM136 <i>mx8<sub>ant</sub>::gltF-mCherry</i> (pSWU30gltFC) | This work             | $\Delta gltF gltF-mCherry$                         |
| TM406                               | TM273 $\Delta pilA$ (pBJ $\Delta pilA$ )                   | This work             | $\Delta gltF \Delta pilA gltC-mCherry$             |
| TM247                               | <i>agmU-mcherry</i>                                        | [18]                  | <i>agmU-mcherry</i>                                |
| TM410                               | TM247 <i>pilA::tet</i>                                     | This work             | $\Omega pilA agmU-mcherry$                         |
| TM472                               | TM410 <i>aglZ-yfp</i> (pBJ $\Delta glZ$ )                  | This work             | $\Omega pilA agmU-mcherry aglZ-yfp$                |
| TM470                               | TM410 $\Delta aglQ$ (pBJ $\Delta aglQ$ )                   | This work             | $\Delta aglQ \Omega pilA agmU-mcherry$             |
| TM471                               | TM406 $\Delta aglQ$ (pBJ $\Delta aglQ$ )                   | This work             | $\Delta aglQ \Delta gltF \Delta pilA gltF-mCherry$ |
