# Supplementary material for: Emergence and Modular Evolution of a Novel Motility Machinery in Bacteria
Source: PubMed Central journal article supplement (PMC3169522; doi:10.1371/journal.pgen.1002268), 2011-09-08
Supplement: pgen.1002268.s012.pdf [file pgen.1002268.s012.pdf]

Table S7. Plasmid constructions

| Plasmid     | Construction scheme <sup>a</sup>                                                                                                                                                                                                                                                                                                                                             |
|-------------|------------------------------------------------------------------------------------------------------------------------------------------------------------------------------------------------------------------------------------------------------------------------------------------------------------------------------------------------------------------------------|
| pBJΩ1922    | A 1Kb internal fragment of Mxan_1922 was amplified from the DZ2 chromosome with primers 1922-1 / 1922-2 and cloned at the <i>EcoRI</i> and <i>HindIII</i> sites of pBJ114.                                                                                                                                                                                                   |
| pBJΩ3374    | A 1Kb internal fragment of Mxan_3374 was amplified from the DZ2 chromosome with primers 3374-1 / 3374-2 and cloned at the <i>EcoRI</i> and <i>HindIII</i> sites of pBJ114.                                                                                                                                                                                                   |
| pBJΩ1327    | A 750bp internal fragment of Mxan_1327 was amplified from the DZ2 chromosome with primers ins1327-1 / ins1327-2 and cloned at the <i>HindIII</i> and <i>BamHI</i> sites of pBJ114.                                                                                                                                                                                           |
| pBJΔgltD    | Primer pairs DAGmU7 / DAGmU8 and DAGmU9 / DAGmU10 were used to amplify 1kb fragment upstream and downstream from the <i>gltD</i> open-reading frame. The upstream fragment was first cloned at the <i>EcoRI</i> and <i>KpnI</i> sites of pBJ114. Then, the downstream fragment was ligated at the <i>KpnI</i> and <i>HindIII</i> sites of the pBJ114-upstream fragment.      |
| pBJΔgltE    | Primer pairs DAGlT1 / DAGlT5 and DAGlT6 / DAGlT4 were used to amplify 1kb fragment upstream and downstream from the <i>gltE</i> open-reading frame. The upstream fragment was first cloned at the <i>EcoRI</i> and <i>BamHI</i> sites of pBJ114. Then, the downstream fragment was ligated at the <i>BamHI</i> and <i>HindIII</i> sites of the pBJ114-upstream fragment.     |
| pBJΔgltF    | Primer pairs D4868-1 / D4868-5 and D4868-6 / D4868-4 were used to amplify 1kb fragment upstream and downstream from the <i>gltF</i> open-reading frame. The upstream fragment was first cloned at the <i>EcoRI</i> and <i>BamHI</i> sites of pBJ114. Then, the downstream fragment was ligated at the <i>BamHI</i> and <i>HindIII</i> sites of the pBJ114-upstream fragment. |
| pBJΔgltG    | Primer pairs D4867-1 / D4867-5 and D4867-6 / D4867-4 were used to amplify 1kb fragment upstream and downstream from the <i>gltG</i> open-reading frame. The upstream fragment was first cloned at the <i>EcoRI</i> and <i>BamHI</i> sites of pBJ114. Then, the downstream fragment was ligated at the <i>BamHI</i> and <i>HindIII</i> sites of the pBJ114-upstream fragment. |
| pBJΔgltH    | Primer pairs D4866-1 / D4866-2 and D4866-3 / D4866-4 were used to amplify 1kb fragment upstream and downstream from the <i>gltH</i> open-reading frame. The fragments were then fused by overlap PCR and cloned at the <i>EcoRI</i> and <i>BamHI</i> sites of pBJ114.                                                                                                        |
| pBJΔgltC    | Primer pairs D2541-1 / D2541-2 and D2541-3 / D2541-4 were used to amplify 1kb fragment upstream and downstream from the <i>gltC</i> open-reading frame. The upstream fragment was first cloned at the <i>EcoRI</i> and <i>BamHI</i> sites of pBJ114. Then, the downstream fragment was ligated at the <i>BamHI</i> and <i>HindIII</i> sites of the pBJ114-upstream fragment. |
| pSWU30gltG  | A fragment encompassing <i>gltG</i> and the <i>gltG</i> promoter region was amplified from the DZ2 chromosome with primers prom4867-BamHI / 4867EcoRI-4 and cloned at the <i>BamHI</i> and <i>EcoRI</i> sites of pSWU30.                                                                                                                                                     |
| pSWU30gltFC | Primers prom4868-1 / 4868-sansSTOP-2 were used to amplify the fragment <i>gltF</i> and its promoter from the DZ2 chromosome. Primers 4868-mcherry-3 / mcherry-4 were used to amplify the fragment <i>mCherry</i> from a plasmid containing the <i>mcherry</i> gene. Both fragments were fused by SOE-PCR and cloned at the <i>BamHI</i> and <i>HindIII</i> sites of pSWU30.  |
| pBJΔgltA    | Primer pairs 2540-1 / 2540-2 and 2540-3 / 2540-4 were used to amplify 1kb fragment upstream and downstream from the <i>gltA</i> open-reading frame. The upstream ( <i>EcoRI</i> / <i>XbaI</i> ) and downstream ( <i>XbaI</i> / <i>HindIII</i> ) fragment was cloned in one step at the <i>EcoRI</i> and <i>HindIII</i> sites of pBJ114.                                      |
| pBJΔgltB    | Primer pairs 2539-1 / 2539-2 and 2539-3 / 2539-4 were used to amplify 1kb fragment upstream and downstream from the <i>gltB</i> open-reading frame. The upstream ( <i>EcoRI</i> / <i>XbaI</i> ) and downstream ( <i>XbaI</i> / <i>HindIII</i> ) fragment was cloned in one step at the <i>EcoRI</i> and <i>HindIII</i> sites of                                              |

---

|           |                                                                                                                                                                                                                                                                                                                                                    |
|-----------|----------------------------------------------------------------------------------------------------------------------------------------------------------------------------------------------------------------------------------------------------------------------------------------------------------------------------------------------------|
| pBJΔgltK  | pBJ114.<br>Primer pairs 2538-1 / 2538-2 and 2538-3 / 2538-4 were used to amplify 1kb fragment upstream and downstream from the <i>gltK</i> open-reading frame. The upstream ( <i>EcoRI</i> / <i>XbaI</i> ) and downstream ( <i>XbaI</i> / <i>HindIII</i> ) fragment was cloned in one step at the <i>EcoRI</i> and <i>HindIII</i> sites of pBJ114. |
| pUT18AglR | A fragment encompassing <i>aglR</i> was amplified from the DZ2 chromosome with primers GMOA-O1 / GMOA-O2 and cloned at the <i>HindIII</i> and <i>EcoRI</i> sites of pUT18.                                                                                                                                                                         |
| pKT25GltG | A fragment encompassing <i>gltG</i> was amplified from the DZ2 chromosome with primers 4867-O1 / 4867-O2 and cloned at the <i>XbaI</i> and <i>EcoRI</i> sites of pKT25.                                                                                                                                                                            |

---

<sup>a</sup> All plasmid inserts were sequenced to ensure the absence of PCR-introduced mutations.
